# Supplementary material for: Mechanistic insights into H3B·NMeH2 dehydrogenation by Co-based complexes: a DFT perspective
Source: Royal Society of Chemistry journal article supplement (doi:10.1039/d2nj06155d), 2023-01-01
Supplement: d2nj06155d1.pdf [file d2nj06155d1.pdf]

Supplementary Data

**Mechanistic insights into  $\text{H}_3\text{B}\cdot\text{NMeH}_2$  dehydrogenation by the Co-based complexes: A DFT perspective**

Cheng Peng, Wei Liu and Yong Wang\*

*College of Chemistry, Chemical Engineering and Materials Science, Soochow University, Suzhou 215123, PR China. E-mail: yowang@suda.edu.cn.*

**Table of contents:**

|                                                                                                                                                                                                                                                                                                                                                                                                                                         |       |
|-----------------------------------------------------------------------------------------------------------------------------------------------------------------------------------------------------------------------------------------------------------------------------------------------------------------------------------------------------------------------------------------------------------------------------------------|-------|
| • Complete Gaussian 09 reference. ....                                                                                                                                                                                                                                                                                                                                                                                                  | S2    |
| <b>Table S1.</b> Selected donor-acceptor interactions involved in the bonding of the amidoborane fragment in <b>TS5-7</b> with the second order perturbation theory analysis (SOPT) of the Fock matrix in the natural bond orbital (NBO) basis. BD, LP, RY, denote bonding, lone pair, Rydberg orbitals, respectively. Asterisks denote antibonding NBO orbitals. Interaction energies, $E_{\text{SOPT}}$ , are given in kcal/mol. .... | S2    |
| <b>Table S2.</b> Selected donor-acceptor interactions involved in the bonding of the amidoborane fragment in <b>TS8-9</b> . Interaction energies, $E_{\text{SOPT}}$ , are given in kcal/mol. ....                                                                                                                                                                                                                                       | S3    |
| <b>Table S3.</b> Selected donor-acceptor interactions involved in the bonding of the amidoborane fragment in <b>TS11-12</b> . Interaction energies, $E_{\text{SOPT}}$ , are given in kcal/mol. ....                                                                                                                                                                                                                                     | S3    |
| <b>Table S4.</b> Selected donor-acceptor interactions involved in the bonding of the amidoborane fragment in <b>TS12-13</b> . Interaction energies, $E_{\text{SOPT}}$ , are given in kcal/mol. ....                                                                                                                                                                                                                                     | S4    |
| <b>Table S5.</b> Atom pair delta-g indices and percentage contributions of <b>TS5-7</b> . ....                                                                                                                                                                                                                                                                                                                                          | S5    |
| <b>Table S6.</b> Atom pair delta-g indices and percentage contributions of <b>TS8-9</b> . ....                                                                                                                                                                                                                                                                                                                                          | S6    |
| <b>Table S7.</b> Atom pair delta-g indices and percentage contributions of <b>TS11-12</b> . ....                                                                                                                                                                                                                                                                                                                                        | S7    |
| <b>Table S8.</b> Atom pair delta-g indices and percentage contributions of <b>TS12-13</b> . ....                                                                                                                                                                                                                                                                                                                                        | S8    |
| Cartesian coordinates of selected reactants, intermediates, and transition states. ....                                                                                                                                                                                                                                                                                                                                                 | S9-41 |

## Complete Gaussian 09 reference

Frisch, M. J.; Trucks, G. W.; Schlegel, H. B.; Scuseria, G. E.; Robb, M. A.; Cheeseman, J. R.; Scalmani, G.; Barone, V.; Mennucci, B.; Petersson, G. A.; Nakatsuji, H.; Caricato, M.; Li, X.; Hratchian, H. P.; Izmaylov, A. F.; Bloino, J.; Zheng, G.; Sonnenberg, J. L.; Hada, M.; Ehara, M.; Toyota, K.; Fukuda, R.; Hasegawa, J.; Ishida, M.; Nakajima, T.; Honda, Y.; Kitao, O.; Nakai, H.; Vreven, T.; Montgomery, J. A., Jr.; Peralta, J. E.; Ogliaro, F.; Bearpark, M.; Heyd, J. J.; Brothers, E.; Kudin, K. N.; Staroverov, V. N.; Kobayashi, R.; Normand, J.; Raghavachari, K.; Rendell, A.; Burant, J. C.; Iyengar, S. S.; Tomasi, J.; Cossi, M.; Rega, N.; Millam, N. J.; Klene, M.; Knox, J. E.; Cross, J. B.; Bakken, V.; Adamo, C.; Jaramillo, J.; Gomperts, R.; Stratmann, R. E.; Yazyev, O.; Austin, A. J.; Cammi, R.; Pomelli, C.; Ochterski, J. W.; Martin, R. L.; Morokuma, K.; Zakrzewski, V. G.; Voth, G. A.; Salvador, P.; Dannenberg, J. J.; Dapprich, S.; Daniels, A. D.; Farkas, Ö .; Foresman, J. B.; Ortiz, J. V.; Cioslowski, J.; Fox, D. J. *Gaussian 09, Revision D.01*; Gaussian, Inc.: Wallingford, CT, 2013.

**Table S1.** Selected donor-acceptor interactions involved in the bonding of the amidoborane fragment in **TS5-7** with the second order perturbation theory analysis (SOPT) of the Fock matrix in the natural bond orbital (NBO) basis. BD, LP, RY, denote bonding, lone pair, Rydberg orbitals, respectively. Asterisks denote antibonding NBO orbitals. Interaction energies,  $E_{\text{SOPT}}$ , are given in kcal/mol.

| <b>TS5-7</b> | Donor  | Contribution                 | Acceptor | Contribution                 | $E_{\text{SOPT}}$ |
|--------------|--------|------------------------------|----------|------------------------------|-------------------|
| N→H-H        | LP N   | s(16%)<br>p(84%)             | BD* H-H  | 57% H s(99%)<br>43% H s(99%) | 19.03             |
| H-H→Co       | BD H-H | 57% H s(99%)<br>43% H s(99%) | LP* Co   | s (28%)<br>d (70%)           | 17.87             |

**Table S2.** Selected donor-acceptor interactions involved in the bonding of the amidoborane fragment in **TS8-9**. Interaction energies,  $E_{\text{SOPT}}$ , are given in kcal/mol.

| <b>TS8-9</b> | Donor  | Contribution     | Acceptor | Contribution     | $E_{\text{SOPT}}$ |
|--------------|--------|------------------|----------|------------------|-------------------|
| H(B)→B       | LP H   | s(99%)           | LP* B    | s(3%)<br>p(97%)  | 142.81            |
| H→Co         | LP H   | s(99%)           | LP* Co   | s(80%)<br>d(18%) | 88.61             |
| Co→H(B)      | LP* Co | s(80%)<br>d(18%) | RY* H    | s(99%)           | 55.06             |

**Table S3.** Selected donor-acceptor interactions involved in the bonding of the amidoborane fragment in **TS11-12**. Interaction energies,  $E_{\text{SOPT}}$ , are given in kcal/mol.

| <b>TS11-12</b> | Donor | Contribution | Acceptor | Contribution               | $E_{\text{SOPT}}$ |
|----------------|-------|--------------|----------|----------------------------|-------------------|
| H(N)→Co        | LP H  | s(100%)      | LP* Co   | s(2%)<br>p(97%)            | 77.16             |
| N→Co           | LP N  | p(99%)       | LP* Co   | s(17%)<br>p(71%)<br>d(17%) | 14.54             |

**Table S4.** Selected donor-acceptor interactions involved in the bonding of the amidoborane fragment in **TS12-13**. Interaction energies,  $E_{\text{SOPT}}$ , are given in kcal/mol.

| <b>TS12-13</b> | Donor    | Contribution                                       | Acceptor | Contribution               | $E_{\text{SOPT}}$ |
|----------------|----------|----------------------------------------------------|----------|----------------------------|-------------------|
| H(B)→B         | LP H     | s(100%)                                            | LP* B    | s(5%)<br>p(95%)            | 788.74            |
| Co-H→Co        | BD* Co-H | 43% Co s(21%)<br>p(19%)<br>d(60%)<br>57% H s(100%) | LP* Co   | s(18%)<br>p(69%)<br>d(13%) | 241.44            |
| H→Co           | LP H     | s(100%)                                            | LP* Co   | s(18%)<br>p(69%)<br>d(13%) | 107.85            |
| Co→B           | LP* Co   | s(18%)<br>p(69%)<br>d(13%)                         | RY* B    | p(86%)<br>d(14%)           | 84.25             |

**Table S5.** Atom pair delta-g indices and percentage contributions of **TS5-7**.

| <b>TS5-7</b> |                             |                          |
|--------------|-----------------------------|--------------------------|
| Bond         | Atomic pair delta-g indices | Percentage contributions |
| N5-H69       | 0.434473                    | 35.82%                   |
| Co1-H70      | 0.178879                    | 14.75%                   |
| Co1-H64      | 0.161790                    | 13.34%                   |
| Co1-N62      | 0.083446                    | 6.88%                    |
| Co1-H69      | 0.074999                    | 6.18%                    |
| Co1-B59      | 0.043971                    | 3.62%                    |
| N5-B59       | 0.042929                    | 3.54%                    |
| N5-H58       | 0.035369                    | 2.92%                    |
| Co1-H61      | 0.023748                    | 1.96%                    |
| N5-H61       | 0.023369                    | 1.93%                    |
| Co1-H58      | 0.023334                    | 1.92%                    |
| Co1-C65      | 0.022362                    | 1.84%                    |
| N5-N62       | 0.015214                    | 1.25%                    |
| N5-H64       | 0.011072                    | 0.91%                    |
| Co1-H68      | 0.009434                    | 0.78%                    |

**Table S6.** Atom pair delta-g indices and percentage contributions of **TS8-9**.

| <b>TS8-9</b> |                             |                          |
|--------------|-----------------------------|--------------------------|
| Bond         | Atomic pair delta-g indices | Percentage contributions |
| Co1-H68      | 0.305374                    | 45.62%                   |
| Co1-B59      | 0.096454                    | 14.41%                   |
| N5-H68       | 0.045893                    | 6.86%                    |
| Co1-N62      | 0.036378                    | 5.44%                    |
| Co1-H60      | 0.030649                    | 4.58%                    |
| Co1-H61      | 0.029410                    | 4.39%                    |
| N5-B59       | 0.027533                    | 4.11%                    |
| N5-N62       | 0.027153                    | 4.06%                    |
| N5-C64       | 0.013015                    | 1.94%                    |
| Co1-H63      | 0.009921                    | 1.48%                    |
| Co1-C64      | 0.009580                    | 1.43%                    |
| N5-H67       | 0.008606                    | 1.29%                    |
| N5-H63       | 0.007988                    | 1.19%                    |
| Co1-H65      | 0.005156                    | 0.77%                    |
| N5-H65       | 0.004544                    | 0.68%                    |

**Table S7.** Atom pair delta-g indices and percentage contributions of **TS11-12**.

| <b>TS11-12</b> |                             |                          |
|----------------|-----------------------------|--------------------------|
| Bond           | Atomic pair delta-g indices | Percentage contributions |
| N4-H65         | 0.435293                    | 41.00%                   |
| Co1-H69        | 0.296436                    | 27.92%                   |
| Co1-H65        | 0.065180                    | 6.14%                    |
| Co1-H60        | 0.047561                    | 4.48%                    |
| Co1-N59        | 0.038030                    | 3.58%                    |
| N4-B57         | 0.026940                    | 2.54%                    |
| Co1-B57        | 0.023890                    | 2.25%                    |
| N4-H67         | 0.022488                    | 2.12%                    |
| N4-H69         | 0.020103                    | 1.89%                    |
| N4-H68         | 0.016374                    | 1.54%                    |
| Co1-H67        | 0.015202                    | 1.43%                    |
| Co1-H68        | 0.010999                    | 1.04%                    |
| Co1-C61        | 0.010868                    | 1.02%                    |
| N4-N59         | 0.008401                    | 0.79%                    |
| N4-H60         | 0.007683                    | 0.72%                    |

**Table S8.** Atom pair delta-g indices and percentage contributions of **TS12-13**.

| <b>TS12-13</b> |                             |                          |
|----------------|-----------------------------|--------------------------|
| Bond           | Atomic pair delta-g indices | Percentage contributions |
| N4-H65         | 0.435165                    | 26.81%                   |
| Co1-H66        | 0.178879                    | 22.71%                   |
| Co1-H68        | 0.290846                    | 17.92%                   |
| Co1-B57        | 0.110943                    | 6.84%                    |
| Co1-H65        | 0.083447                    | 5.14%                    |
| N4-H68         | 0.059315                    | 3.65%                    |
| N4-N59         | 0.043553                    | 2.68%                    |
| Co1-N59        | 0.042493                    | 2.62%                    |
| N4-B57         | 0.039904                    | 2.46%                    |
| Co1-H69        | 0.034123                    | 2.10%                    |
| Co1-H58        | 0.031345                    | 1.93%                    |
| N4-H60         | 0.013654                    | 0.84%                    |
| N4-C61         | 0.011307                    | 0.70%                    |
| Co1-H60        | 0.010774                    | 0.66%                    |
| Co1-C61        | 0.010154                    | 0.63%                    |



Cartesian coordinates of selected reactants, intermediates, and transition states.

**NH<sub>2</sub>MeBH<sub>3</sub>**

E<sub>gas</sub> = -122.462390 a.u.

E<sub>solv</sub> = -122.5941369 a.u.

Zero-point energy correction = 0.073061 a.u.

|   |             |             |             |
|---|-------------|-------------|-------------|
| N | 0.00878800  | 0.55042500  | 0.00000100  |
| H | 0.00866400  | 1.16253900  | 0.81520100  |
| B | -1.40503400 | -0.30751200 | 0.00000600  |
| H | -1.36934700 | -0.96930100 | 1.01447900  |
| H | -2.27564300 | 0.53487700  | -0.00004500 |
| C | 1.23377000  | -0.28572400 | -0.00000800 |
| H | 1.20753800  | -0.92245100 | 0.88463500  |
| H | 1.20746700  | -0.92250600 | -0.88459900 |
| H | 2.14304900  | 0.32254000  | -0.00003300 |
| H | -1.36929600 | -0.96933000 | -1.01445300 |
| H | 0.00860200  | 1.16256500  | -0.81517800 |

**NHMeBH<sub>2</sub>**

E<sub>gas</sub> = -121.305739 a.u.

E<sub>solv</sub> = -121.3986866 a.u.

Zero-point energy correction = 0.051691 a.u.

|   |             |             |             |
|---|-------------|-------------|-------------|
| N | 0.14572700  | -0.41747300 | 0.00015900  |
| H | 0.14122100  | -1.42963200 | -0.00012700 |
| B | 1.36375700  | 0.25184500  | 0.00011800  |
| H | 1.36931600  | 1.44847400  | -0.00033000 |
| H | 2.37298600  | -0.38926900 | -0.00026400 |
| C | -1.18539900 | 0.17114400  | -0.00008200 |
| H | -1.75854300 | -0.12522800 | 0.88717700  |
| H | -1.09261900 | 1.25874200  | -0.00109200 |
| H | -1.75884300 | -0.12686600 | -0.88658100 |

**H<sub>2</sub>**

E<sub>gas</sub> = -1.1798530 a.u.

E<sub>solv</sub> = -1.1598602 a.u.

Zero-point energy correction = -0.001314 a.u.

|   |            |             |             |
|---|------------|-------------|-------------|
| H | 2.11823590 | -0.24302823 | -0.02305752 |
| H | 1.51823590 | -0.24302823 | -0.02305752 |

**NMeH<sub>3</sub>Cl**

E<sub>gas</sub> = -556.641144 a.u.

E<sub>solv</sub> = -556.76971360 a.u.

Zero-point energy correction = 0.045731 a.u.

|    |             |             |             |
|----|-------------|-------------|-------------|
| N  | -1.15782500 | 0.67894700  | 0.00000200  |
| H  | -1.35489700 | 1.24974700  | -0.81903900 |
| C  | -1.97055200 | -0.55016800 | 0.00000000  |
| H  | -1.71528200 | -1.14066000 | -0.88261000 |
| H  | -1.71531000 | -1.14064500 | 0.88262800  |
| H  | -3.05024900 | -0.35952300 | -0.00001900 |
| H  | 0.35061900  | 0.30408300  | -0.00003700 |
| Cl | 1.69224100  | -0.09496300 | 0.00000100  |
| H  | -1.35489800 | 1.24974800  | 0.81904200  |

**NMeH<sub>2</sub>**

E<sub>gas</sub> = -95.822378 a.u.

E<sub>solv</sub> = -95.9031196 a.u.

Zero-point energy correction = 0.041308 a.u.

|   |             |             |             |
|---|-------------|-------------|-------------|
| N | 0.75248200  | 0.00000200  | -0.12584400 |
| H | 1.14307900  | 0.81126500  | 0.34765000  |
| H | 1.14316700  | -0.81123100 | 0.34763900  |
| C | -0.70546000 | -0.00000200 | 0.01754700  |
| H | -1.08664200 | -0.00029800 | 1.05302300  |
| H | -1.11711500 | 0.88053700  | -0.48610300 |
| H | -1.11709900 | -0.88027200 | -0.48658400 |

**H<sub>2</sub>B(NMeH)<sub>2</sub>Cl**

E<sub>gas</sub> = -677.927989 a.u.

E<sub>solv</sub> = -678.20717870 a.u.

Zero-point energy correction = 0.122530 a.u.

|    |             |             |             |
|----|-------------|-------------|-------------|
| Cl | 2.98054100  | -0.27259800 | 0.11362900  |
| B  | -0.72213600 | -0.91869000 | 0.23851800  |
| N  | -2.29971600 | -0.77029000 | -0.26412600 |
| N  | 0.20006600  | 0.13934700  | -0.41480000 |
| H  | 1.30562100  | -0.14778600 | -0.12999100 |
| H  | -0.76393900 | -0.78128400 | 1.43262900  |

|   |             |             |             |
|---|-------------|-------------|-------------|
| H | -0.41260400 | -2.01644900 | -0.14513800 |
| H | -2.71257800 | -1.66681300 | -0.00346100 |
| C | -3.13041500 | 0.32562800  | 0.31033000  |
| H | -2.34473800 | -0.74172100 | -1.28448000 |
| H | -2.73990900 | 1.28532900  | -0.02485500 |
| H | -4.17455200 | 0.22898300  | 0.00322600  |
| H | -3.05342300 | 0.27366500  | 1.39622600  |
| C | 0.11972100  | 1.57099800  | -0.04051300 |
| H | 1.06789000  | 2.05178300  | -0.29275500 |
| H | -0.69956100 | 2.08749500  | -0.55084300 |
| H | -0.02432000 | 1.63857100  | 1.03878100  |
| H | 0.25530200  | 0.05269200  | -1.43003400 |

**INT1**

$E_{\text{gas}} = -2434.650860$  a.u.

$E_{\text{solv}} = -2436.3523132$  a.u.

Zero-point energy correction = 0.4535090 a.u.

|    |             |             |             |
|----|-------------|-------------|-------------|
| Co | 0.00935400  | -0.04735700 | -0.30016200 |
| C  | -2.30536400 | 0.62529100  | 1.78312000  |
| C  | -1.34595200 | -0.29504500 | 2.55322500  |
| N  | -0.05364600 | -0.54466100 | 1.84062800  |
| C  | 1.14765000  | -0.08996800 | 2.58322600  |
| C  | 2.43634800  | -0.59568000 | 1.92166400  |
| P  | 2.55845100  | -0.09327400 | 0.11255400  |
| C  | 3.70293000  | 1.40552100  | 0.16091700  |
| C  | 3.19643500  | 2.46997900  | 1.14946300  |
| C  | 3.85536900  | 2.01571300  | -1.24308100 |
| C  | 3.55470400  | -1.52319200 | -0.59828000 |
| C  | 4.97354100  | -1.68326400 | -0.03335700 |
| C  | 3.54554300  | -1.52350800 | -2.13602200 |
| P  | -2.52157200 | 0.04287600  | 0.01819500  |
| C  | -3.73275500 | 1.25067600  | -0.78173200 |
| C  | -3.45519300 | 1.31689400  | -2.29547600 |
| C  | -3.69629800 | 2.65931400  | -0.16757500 |
| C  | -3.48105700 | -1.56850900 | 0.19255100  |
| C  | -3.79608100 | -2.15071100 | -1.19627900 |
| C  | -4.73337900 | -1.50754800 | 1.07857500  |

|   |             |             |             |
|---|-------------|-------------|-------------|
| H | -1.87034400 | 1.62725100  | 1.71320200  |
| H | -3.24581600 | 0.70860400  | 2.33920300  |
| H | -1.82564400 | -1.26109000 | 2.74299600  |
| H | -1.12971900 | 0.14401600  | 3.53376500  |
| H | 0.03575800  | -1.54808600 | 1.67618200  |
| H | 1.10607100  | -0.44609500 | 3.62357200  |
| H | 1.12422700  | 1.00357800  | 2.60909600  |
| H | 2.44942800  | -1.69225900 | 1.95336200  |
| H | 3.29922700  | -0.25170700 | 2.50159400  |
| H | 4.68244300  | 1.04999400  | 0.50785400  |
| H | 3.17476500  | 2.10640600  | 2.18178500  |
| H | 3.86934400  | 3.33516700  | 1.12846200  |
| H | 2.19575100  | 2.81571000  | 0.87368800  |
| H | 4.29754800  | 1.31608900  | -1.95693500 |
| H | 4.51016400  | 2.89370200  | -1.19493500 |
| H | 2.88387600  | 2.33671100  | -1.63031400 |
| H | 2.94619900  | -2.38073900 | -0.28504700 |
| H | 4.98915200  | -1.72329000 | 1.06102000  |
| H | 5.41819300  | -2.61527800 | -0.40161400 |
| H | 5.63042600  | -0.86600800 | -0.34969300 |
| H | 2.52623000  | -1.44767100 | -2.52203000 |
| H | 3.97517400  | -2.46203300 | -2.50454400 |
| H | 4.14299700  | -0.70679500 | -2.55271700 |
| H | -4.73559900 | 0.83258200  | -0.62438800 |
| H | -3.49412300 | 0.33221200  | -2.77001000 |
| H | -4.20310900 | 1.95301400  | -2.78360400 |
| H | -2.46527100 | 1.74324400  | -2.48155700 |
| H | -3.99209300 | 2.66387600  | 0.88591600  |
| H | -4.39736000 | 3.30676700  | -0.70715600 |
| H | -2.69889100 | 3.09959200  | -0.25477800 |
| H | -2.75106100 | -2.24393300 | 0.65736200  |
| H | -2.89046900 | -2.23574700 | -1.80266900 |
| H | -4.22579700 | -3.15328900 | -1.09055700 |
| H | -4.52811200 | -1.53847500 | -1.73439700 |
| H | -4.50945300 | -1.19038800 | 2.10179000  |
| H | -5.19810300 | -2.49882700 | 1.13842900  |

|                                               |             |             |             |    |             |             |             |
|-----------------------------------------------|-------------|-------------|-------------|----|-------------|-------------|-------------|
| H                                             | -5.48662900 | -0.82246100 | 0.67429300  | H  | 4.71644900  | -0.80914400 | 0.87172200  |
| Cl                                            | 0.04696700  | -2.30255900 | -0.98227100 | H  | 3.82103300  | -3.12380600 | 0.66073900  |
| Cl                                            | -0.00215700 | 2.23356600  | -0.83087700 | H  | 4.20226600  | -2.75748300 | 2.34087600  |
| <b>INT2</b>                                   |             |             |             | H  | 2.51564900  | -2.73221800 | 1.80520900  |
| E <sub>gas</sub> = -2557.108537 a.u.          |             |             |             | H  | 3.53586800  | 0.90804900  | 2.31934700  |
| E <sub>solv</sub> = -2558.9622866 a.u.        |             |             |             | H  | 4.13726700  | -0.46161800 | 3.26477700  |
| Zero-point energy correction = 0.5482950 a.u. |             |             |             | H  | 2.41338800  | -0.34799000 | 2.85118700  |
| Co                                            | 0.01413200  | -0.02563500 | 0.05433500  | H  | 2.95459500  | 1.15571600  | -1.95148400 |
| C                                             | -2.31176200 | -2.13197100 | -0.74639600 | H  | 4.74629900  | -0.56801300 | -2.38828400 |
| C                                             | -1.32065500 | -2.14307400 | -1.91847200 | H  | 5.42235200  | 1.06073900  | -2.33763000 |
| N                                             | 0.00048300  | -1.54097800 | -1.58866200 | H  | 5.63019600  | -0.01620700 | -0.95818200 |
| C                                             | 1.10660900  | -2.50489200 | -1.38901700 | H  | 3.01063800  | 2.53637900  | 0.13615400  |
| C                                             | 2.45341300  | -1.77264200 | -1.43214200 | H  | 4.37639900  | 2.88846200  | -0.94043600 |
| P                                             | 2.56255900  | -0.36763900 | -0.18123700 | H  | 4.62501600  | 1.91183400  | 0.50771600  |
| C                                             | 3.68716100  | -0.99109200 | 1.20777800  | H  | -4.69206000 | -0.29346300 | 1.02578400  |
| C                                             | 3.53987800  | -2.49138500 | 1.50860600  | H  | -3.30142200 | 1.52552300  | 2.04699600  |
| C                                             | 3.42663600  | -0.16719400 | 2.48296200  | H  | -3.99667700 | 0.48403100  | 3.29568400  |
| C                                             | 3.62784700  | 0.86189900  | -1.13606100 | H  | -2.28788600 | 0.31220700  | 2.83701800  |
| C                                             | 4.92269900  | 0.29207000  | -1.73583800 | H  | -4.11886000 | -2.69534600 | 1.32523400  |
| C                                             | 3.92002300  | 2.12077300  | -0.30445200 | H  | -4.43047600 | -1.92783400 | 2.88460000  |
| P                                             | -2.52380800 | -0.39810800 | -0.08368000 | H  | -2.76238800 | -2.25184300 | 2.38403300  |
| C                                             | -3.69054000 | -0.53915600 | 1.40114500  | H  | -2.88893500 | 0.47232000  | -2.28011700 |
| C                                             | -3.29294800 | 0.50945700  | 2.45500700  | H  | -2.90203400 | 2.45086300  | -0.86187600 |
| C                                             | -3.74789900 | -1.94176000 | 2.02655800  | H  | -4.37855000 | 2.42052500  | -1.83046800 |
| C                                             | -3.56295200 | 0.44758200  | -1.41448500 | H  | -4.45386800 | 1.98396300  | -0.12131900 |
| C                                             | -3.83833100 | 1.90968800  | -1.02519000 | H  | -4.67734900 | -1.29283500 | -2.17029700 |
| C                                             | -4.85804700 | -0.27395900 | -1.81551600 | H  | -5.35505400 | 0.27041000  | -2.62757400 |
| H                                             | -1.90814000 | -2.72074300 | 0.08090600  | H  | -5.56860700 | -0.33079000 | -0.98373400 |
| H                                             | -3.25438500 | -2.59030800 | -1.06394500 | Cl | 0.03198700  | 1.64277700  | -1.82344000 |
| H                                             | -1.73668500 | -1.58178900 | -2.76155800 | Cl | -0.02974700 | -1.62790600 | 1.84210100  |
| H                                             | -1.17783700 | -3.17417200 | -2.26829000 | H  | -0.11139800 | 1.37058500  | 1.39361900  |
| H                                             | 0.25337800  | -0.90674900 | -2.34537000 | H  | -0.15463600 | 3.15791100  | -0.25218100 |
| H                                             | 1.08600600  | -3.27602000 | -2.17464100 | H  | -1.41910900 | 3.47000300  | 0.73020800  |
| H                                             | 0.95389100  | -2.99461000 | -0.42356600 | B  | 0.21295800  | 2.50108700  | 1.77721600  |
| H                                             | 2.57449800  | -1.32022100 | -2.42465400 | H  | -0.32510500 | 2.71573000  | 2.83726600  |
| H                                             | 3.26786100  | -2.49218000 | -1.31446000 | H  | 1.40882800  | 2.64959600  | 1.78172300  |

|                                               |             |             |             |    |             |             |             |
|-----------------------------------------------|-------------|-------------|-------------|----|-------------|-------------|-------------|
| N                                             | -0.40168700 | 3.52013200  | 0.68541800  | H  | 2.52436700  | -0.56314100 | -3.64422100 |
| C                                             | 0.03048100  | 4.92834800  | 0.84366000  | H  | 2.76882000  | -1.39053900 | -2.10592900 |
| H                                             | 1.11525700  | 4.96759500  | 0.74032000  | H  | 2.46737800  | 1.63488000  | -2.49365600 |
| H                                             | -0.43504000 | 5.57134700  | 0.09165300  | H  | 3.98606200  | 0.80463400  | -2.17267300 |
| H                                             | -0.23756300 | 5.27146600  | 1.84452600  | H  | 4.88940700  | 1.14793000  | 0.40020500  |
| <b>TS2-3<sub>N</sub></b>                      |             |             |             | H  | 4.76298500  | -1.02719300 | -0.80573300 |
| E <sub>gas</sub> = -2652.8960610 a.u.         |             |             |             | H  | 5.45244100  | -1.25877800 | 0.80027100  |
| E <sub>solv</sub> = -2654.8507129 a.u.        |             |             |             | H  | 3.77298000  | -1.71324700 | 0.49707400  |
| Zero-point energy correction = 0.6009120 a.u. |             |             |             | H  | 3.77104500  | 1.50964700  | 2.59715000  |
| <b>Three lowest frequencies:</b>              |             |             |             | H  | 4.86320600  | 0.12868000  | 2.71586200  |
| <b>-146.0790      20.2825      24.4573</b>    |             |             |             | H  | 3.11271200  | -0.12458200 | 2.57325800  |
| Co                                            | 0.23523000  | -0.04226600 | 0.08227600  | H  | 1.60038900  | 3.04221800  | -0.74504900 |
| C                                             | 0.25687400  | -2.94187900 | -1.85408600 | H  | 4.01351800  | 3.30979800  | -1.43023500 |
| C                                             | 0.19791400  | -1.76588900 | -2.84161300 | H  | 3.45830200  | 4.67170800  | -0.45307100 |
| N                                             | 0.86114800  | -0.56609500 | -2.30531700 | H  | 4.47948800  | 3.43306900  | 0.27485300  |
| C                                             | 2.30341400  | -0.51101000 | -2.56431200 | H  | 1.03636200  | 2.71050900  | 1.70805100  |
| C                                             | 2.90823800  | 0.77077000  | -1.98275400 | H  | 1.57013200  | 4.35506100  | 1.28791200  |
| P                                             | 2.52100400  | 0.95891100  | -0.16119200 | H  | 2.66558900  | 3.25554500  | 2.12014900  |
| C                                             | 4.10885800  | 0.43883500  | 0.70583500  | H  | -0.21763700 | -4.73914700 | 0.50007400  |
| C                                             | 4.54183500  | -0.96917200 | 0.26417100  | H  | -1.76452100 | -3.81183900 | 2.21955500  |
| C                                             | 3.94900200  | 0.49516300  | 2.23482700  | H  | -0.31183600 | -4.43260300 | 3.00538200  |
| C                                             | 2.39363800  | 2.83431400  | -0.01413700 | H  | -0.51771500 | -2.68492200 | 2.77457100  |
| C                                             | 3.66070700  | 3.59467500  | -0.43431300 | H  | 2.13424600  | -3.85573500 | 0.26220200  |
| C                                             | 1.88272700  | 3.30662500  | 1.35746800  | H  | 1.86545200  | -4.55649600 | 1.85861400  |
| P                                             | -0.48092900 | -2.42608700 | -0.22010900 | H  | 1.86175900  | -2.79900400 | 1.66354200  |
| C                                             | 0.04477500  | -3.78213900 | 0.96981400  | H  | -2.43747500 | -2.14654300 | -1.52464400 |
| C                                             | -0.68669600 | -3.66517900 | 2.31829900  | H  | -2.88551100 | -0.78382200 | 0.47297500  |
| C                                             | 1.56596800  | -3.74122700 | 1.19054500  | H  | -4.23419900 | -1.84476000 | 0.12856700  |
| C                                             | -2.32471500 | -2.63164500 | -0.54575500 | H  | -3.13177700 | -2.23171200 | 1.45962900  |
| C                                             | -3.18679900 | -1.83159200 | 0.44325300  | H  | -2.20974000 | -4.66057400 | -1.40626000 |
| C                                             | -2.79216400 | -4.08952600 | -0.67552900 | H  | -3.83736000 | -4.10897600 | -1.00288500 |
| H                                             | 1.29636400  | -3.24053100 | -1.68377400 | H  | -2.74226400 | -4.61733600 | 0.28202800  |
| H                                             | -0.26017800 | -3.81206700 | -2.27328100 | Cl | -5.25129300 | 1.44959100  | 0.16396900  |
| H                                             | -0.84349600 | -1.49861600 | -3.04022000 | Cl | -0.19721000 | 0.21497100  | 2.40713800  |
| H                                             | 0.63778600  | -2.07017600 | -3.80504400 | H  | -3.62757500 | 1.69214500  | 1.04450900  |
| H                                             | 0.40640100  | 0.26318600  | -2.68403300 | H  | -2.03989300 | 1.38359100  | 1.78699900  |

|                                                        |             |             |             |   |             |             |             |
|--------------------------------------------------------|-------------|-------------|-------------|---|-------------|-------------|-------------|
| B                                                      | -1.61817000 | 1.61571200  | -2.14042800 | C | 4.16049200  | -0.87879000 | -1.17268400 |
| H                                                      | -1.96798100 | 0.48757000  | -2.35826100 | C | 3.82014600  | -0.47368200 | -2.61903000 |
| H                                                      | -0.63254000 | 2.04772100  | -2.69413500 | C | 4.39838200  | -2.39443900 | -1.08150800 |
| N                                                      | -2.64041200 | 2.08280400  | 1.32269900  | C | 3.56262000  | 1.31159300  | 0.74561800  |
| C                                                      | -2.81082400 | 3.30091600  | 2.14646700  | C | 3.75722100  | 2.37960300  | -0.34503700 |
| H                                                      | -3.51755400 | 3.96065900  | 1.64178500  | C | 4.84519900  | 1.12458600  | 1.56932100  |
| H                                                      | -3.22319100 | 3.01609100  | 3.11523800  | H | 2.55439900  | -2.42347600 | 1.01565000  |
| H                                                      | -1.85268800 | 3.80334300  | 2.29039200  | H | 3.73267200  | -1.50556000 | 1.95997800  |
| N                                                      | -2.59812100 | 2.55014500  | -1.70933500 | H | 1.85267500  | -0.01431200 | 2.79141300  |
| H                                                      | -3.52642800 | 2.21348200  | -1.44390600 | H | 1.67162700  | -1.69298500 | 3.27925400  |
| H                                                      | -2.21661400 | 2.28104000  | 0.40342100  | H | -0.20710100 | -0.23322500 | 2.23024400  |
| C                                                      | -2.50143300 | 3.99628200  | -1.80869800 | H | -0.30132800 | -2.64545400 | 2.99526000  |
| H                                                      | -1.49038900 | 4.27593200  | -2.11860700 | H | -0.07037600 | -3.01192000 | 1.27366200  |
| H                                                      | -3.20464100 | 4.40333000  | -2.54790000 | H | -2.28419700 | -1.27055600 | 2.49370500  |
| H                                                      | -2.71570100 | 4.50184600  | -0.85547400 | H | -2.51078500 | -2.92887800 | 1.92996100  |
| H                                                      | -0.65144200 | 1.09352300  | -0.71711700 | H | -4.14228500 | -2.71182600 | -0.66453000 |
| <b>T<sub>S2-3B</sub></b>                               |             |             |             | H | -2.55999800 | -4.37509500 | 0.30719700  |
| $E_{\text{gas}} = -2652.868205$ a.u.                   |             |             |             | H | -2.93224700 | -4.77196400 | -1.36913600 |
| $E_{\text{solv}} = -2654.8261349$ a.u.                 |             |             |             | H | -1.38106400 | -4.01341600 | -0.97569600 |
| Zero-point energy correction = 0.605545 a.u.           |             |             |             | H | -3.47524700 | -1.31717500 | -2.67163200 |
| Three lowest frequencies:                              |             |             |             | H | -3.53016700 | -3.04210600 | -3.05468800 |
| <b>-438.6219            19.3518            26.3289</b> |             |             |             | H | -1.96783200 | -2.24300300 | -2.78210400 |
| Co                                                     | 0.15520600  | -0.41355500 | -0.32229100 | H | -3.27761400 | 0.56642700  | 1.20639600  |
| C                                                      | 2.77581800  | -1.43584500 | 1.43131400  | H | -4.60362000 | -1.35650900 | 2.13275400  |
| C                                                      | 1.66646900  | -1.02270200 | 2.40741500  | H | -5.65188100 | -0.05618300 | 1.56702100  |
| N                                                      | 0.31967400  | -1.00626900 | 1.79008700  | H | -5.46524700 | -1.51480200 | 0.59305800  |
| C                                                      | -0.44992600 | -2.26114800 | 1.97441200  | H | -3.44799000 | 1.14572500  | -1.24556500 |
| C                                                      | -1.94823500 | -2.00729500 | 1.75605400  | H | -4.96333300 | 1.44330500  | -0.36968500 |
| P                                                      | -2.31746700 | -1.26743500 | 0.07019700  | H | -4.81168900 | 0.02734200  | -1.40779800 |
| C                                                      | -3.08732600 | -2.65406400 | -0.96253800 | H | 5.08697400  | -0.37048300 | -0.87471500 |
| C                                                      | -2.44501400 | -4.03019900 | -0.72483500 | H | 3.67143100  | 0.60560800  | -2.72302000 |
| C                                                      | -3.01089600 | -2.28406600 | -2.45574500 | H | 4.63545400  | -0.76519500 | -3.29263600 |
| C                                                      | -3.75938100 | -0.13329800 | 0.51039800  | H | 2.90400600  | -0.97351700 | -2.94558200 |
| C                                                      | -4.92828100 | -0.81316700 | 1.24125400  | H | 4.75219200  | -2.70059700 | -0.09235200 |
| C                                                      | -4.26629200 | 0.66374800  | -0.70206800 | H | 5.16445500  | -2.68756500 | -1.80963100 |
| P                                                      | 2.80250000  | -0.24852900 | -0.00985900 | H | 3.48442500  | -2.94834300 | -1.31357000 |

|                                              |             |             |             |   |             |             |             |
|----------------------------------------------|-------------|-------------|-------------|---|-------------|-------------|-------------|
| H                                            | 2.77442900  | 1.67219800  | 1.42025800  | C | -2.52364700 | 0.24952500  | -1.99872500 |
| H                                            | 2.84780100  | 2.52122000  | -0.93721100 | P | -2.30359900 | 0.40598300  | -0.14505000 |
| H                                            | 4.03018200  | 3.34136800  | 0.10674000  | C | -3.39899300 | 1.82454100  | 0.45978300  |
| H                                            | 4.56659100  | 2.10703200  | -1.03107600 | C | -3.53611000 | 2.98302700  | -0.54145000 |
| H                                            | 4.69746200  | 0.46084700  | 2.42613200  | C | -2.89211400 | 2.33932000  | 1.81967000  |
| H                                            | 5.18741000  | 2.09019700  | 1.96225500  | C | -3.23593000 | -1.13390500 | 0.42995000  |
| H                                            | 5.66180000  | 0.71464700  | 0.96470700  | C | -4.65633100 | -1.27703400 | -0.14339900 |
| Cl                                           | 0.69101100  | -2.34718500 | -1.62701500 | C | -3.25226200 | -1.28561400 | 1.95807300  |
| H                                            | -1.18065600 | 4.36952100  | -3.05929300 | P | 2.31989600  | 0.32941100  | -0.32074700 |
| B                                            | -0.63929300 | 2.91888900  | -1.25909300 | C | 3.51820300  | 1.75421300  | 0.00976300  |
| N                                            | -1.31497000 | 4.66681000  | -2.09550800 | C | 3.22033200  | 2.39966500  | 1.37588800  |
| C                                            | -2.71826000 | 5.06913500  | -1.88418100 | C | 3.53635600  | 2.82224000  | -1.09633500 |
| H                                            | -2.83950400 | 5.45842500  | -0.86898700 | C | 3.25334000  | -1.18129300 | 0.32393800  |
| H                                            | -3.06004100 | 5.84019300  | -2.58422500 | C | 3.46364200  | -1.15042100 | 1.84506800  |
| H                                            | -3.35416300 | 4.18708900  | -1.99299200 | C | 4.57814900  | -1.47944400 | -0.39859300 |
| N                                            | -0.82359100 | 3.32371400  | 0.24225400  | H | 3.29159400  | 0.32992500  | -2.62400800 |
| H                                            | -1.72291900 | 3.78773600  | 0.37618200  | H | 2.30149700  | -1.09018300 | -2.28608000 |
| H                                            | -0.90978000 | 2.48523200  | 0.88323100  | H | -0.17287500 | -0.86773900 | -2.39163200 |
| C                                            | 0.24437600  | 4.16770100  | 0.84051500  | H | -1.42408600 | 0.59726300  | -3.82622500 |
| H                                            | 0.03559900  | 4.30794800  | 1.90203400  | H | -1.19933400 | 1.86830000  | -2.60077800 |
| H                                            | 1.19164500  | 3.64241400  | 0.72375500  | H | -2.60847500 | -0.82283400 | -2.20924600 |
| H                                            | 0.29865300  | 5.13046500  | 0.32735600  | H | -3.44234300 | 0.72993100  | -2.34626200 |
| H                                            | 0.08723800  | 1.19632300  | -0.65028100 | H | -4.39364400 | 1.38396500  | 0.60431300  |
| H                                            | -0.68705500 | 5.45669800  | -1.95480900 | H | -3.99006800 | 2.66761700  | -1.48546200 |
| H                                            | 0.44183800  | 3.05672400  | -1.73627200 | H | -4.18684100 | 3.75360700  | -0.11108800 |
| H                                            | -1.52397000 | 2.29393300  | -1.75009600 | H | -2.56447600 | 3.43578700  | -0.75062900 |
| Cl                                           | -1.26212500 | 1.64840300  | 2.72417700  | H | -2.82071000 | 1.54175700  | 2.56598200  |
| <b>INT3<sub>N</sub></b>                      |             |             |             | H | -3.58331600 | 3.09566200  | 2.21031900  |
| $E_{\text{gas}} = -2652.911639$ a.u.         |             |             |             | H | -1.90599800 | 2.79678700  | 1.70619000  |
| $E_{\text{solv}} = -2654.8588514$ a.u.       |             |             |             | H | -2.62771500 | -1.93980500 | -0.00110700 |
| Zero-point energy correction = 0.603945 a.u. |             |             |             | H | -4.67366100 | -1.23754100 | -1.23504500 |
| Co                                           | 0.02213300  | 0.49814100  | -0.01628700 | H | -5.07929800 | -2.24312000 | 0.15626700  |
| C                                            | 2.35614900  | -0.00172500 | -2.16390400 | H | -5.32892400 | -0.50128500 | 0.23700600  |
| C                                            | 1.14633000  | 0.62927600  | -2.85793300 | H | -2.25644900 | -1.19670500 | 2.39935100  |
| N                                            | -0.08861900 | 0.14404000  | -2.22311600 | H | -3.66243400 | -2.26417400 | 2.23700100  |
| C                                            | -1.30424500 | 0.78997800  | -2.74877800 | H | -3.89446300 | -0.53050700 | 2.42343600  |

|    |             |             |             |
|----|-------------|-------------|-------------|
| H  | 4.51365600  | 1.29285200  | 0.05055800  |
| H  | 3.23499400  | 1.67365500  | 2.19416800  |
| H  | 3.97819900  | 3.16070800  | 1.59682300  |
| H  | 2.23973700  | 2.88149500  | 1.35913100  |
| H  | 3.83045100  | 2.41485100  | -2.06818100 |
| H  | 4.26824000  | 3.59577400  | -0.83504600 |
| H  | 2.55843400  | 3.29906400  | -1.19342000 |
| H  | 2.55258500  | -1.99435000 | 0.09565800  |
| H  | 2.53630000  | -0.95781300 | 2.38997300  |
| H  | 3.85901500  | -2.11428700 | 2.18727300  |
| H  | 4.19458800  | -0.38677600 | 2.12987000  |
| H  | 4.45464600  | -1.58820700 | -1.47901400 |
| H  | 5.00316200  | -2.41650200 | -0.01964800 |
| H  | 5.32284300  | -0.69670100 | -0.22046300 |
| Cl | -0.68553200 | -3.13632300 | -2.71266800 |
| N  | 0.14804000  | -0.70593400 | 3.64362800  |
| N  | -0.28790100 | -3.43667300 | 0.16477300  |
| H  | -0.52000400 | -3.40075700 | -0.91901400 |
| C  | 0.21132000  | 0.49693500  | 4.46539400  |
| H  | -0.66233500 | 1.13755100  | 4.29973900  |
| H  | 0.24100100  | 0.21324300  | 5.51945200  |
| H  | 1.10614900  | 1.08745700  | 4.23708900  |
| C  | 0.81904100  | -4.38822700 | 0.42774200  |
| H  | 1.64459000  | -4.14159900 | -0.24003800 |
| H  | 1.13895100  | -4.32010400 | 1.46841600  |
| H  | 0.47830000  | -5.39981000 | 0.20324400  |
| H  | -0.05077800 | -2.44554100 | 0.40572000  |
| Cl | 0.03677200  | 2.84339800  | -0.27136500 |
| H  | 0.05129000  | -0.89745000 | 0.62722700  |
| H  | 1.16772700  | 1.71819200  | -2.75601200 |
| H  | 1.16874700  | 0.38665600  | -3.93187600 |
| H  | -1.12581100 | -3.68098100 | 0.69208100  |
| H  | 0.11421200  | -0.51885100 | 2.64240600  |
| B  | 0.12981600  | -2.02035700 | 4.08562000  |
| H  | 0.07149900  | -2.90014900 | 3.26897600  |
| H  | 0.16941400  | -2.26388900 | 5.25588600  |

### INT3<sub>B</sub>

$$E_{\text{solv}} = E_{\text{solv(H2B(NMeH)2Cl)}} + E_{\text{solv(INT4)}} = -2654.25605740 \text{ a.u.}$$

### INT4

$$E_{\text{gas}} = -1974.976162 \text{ a.u.}$$

$$E_{\text{solv}} = -1976.6370187 \text{ a.u.}$$

Zero-point energy correction = 0.465610 a.u.

|    |             |             |             |
|----|-------------|-------------|-------------|
| Co | 0.01482400  | -0.04339900 | -0.24751700 |
| Cl | -0.01440500 | 2.28662000  | 0.27784600  |
| C  | -2.35043600 | 0.18403000  | 1.77584900  |
| C  | -1.37339900 | -0.72380000 | 2.54661800  |
| N  | -0.03914700 | -0.82227300 | 1.90417400  |
| C  | 1.08467300  | -0.14277600 | 2.57308400  |
| C  | 2.39285700  | -0.51041700 | 1.85496100  |
| P  | 2.26328200  | -0.24019100 | -0.00817000 |
| C  | 3.47229700  | 1.13532600  | -0.47508000 |
| C  | 3.62640200  | 2.22181500  | 0.60168800  |
| C  | 3.02368600  | 1.76219300  | -1.80887700 |
| C  | 3.06469800  | -1.81515700 | -0.66564100 |
| C  | 4.49301900  | -2.08934200 | -0.17050800 |
| C  | 2.97844900  | -1.89255400 | -2.19718000 |
| P  | -2.23356700 | -0.13953100 | -0.06094500 |
| C  | -3.39924900 | 1.07428900  | -0.91594400 |
| C  | -2.79405700 | 1.48418900  | -2.27113000 |
| C  | -3.73690400 | 2.31662700  | -0.07596300 |
| C  | -3.05005200 | -1.81922900 | -0.29689600 |
| C  | -3.04176100 | -2.21598100 | -1.78201700 |
| C  | -4.44988300 | -1.96939600 | 0.31728300  |
| H  | -2.05091600 | 1.22829200  | 1.89336900  |
| H  | -3.36209300 | 0.06881400  | 2.18062600  |
| H  | -1.79137300 | -1.73484600 | 2.61261900  |
| H  | -1.27397400 | -0.36123300 | 3.57871000  |
| H  | 0.19644200  | -1.80404400 | 1.79427800  |
| H  | 1.15837900  | -0.42432000 | 3.63696700  |
| H  | 0.90476600  | 0.93380400  | 2.51032900  |
| H  | 2.60065700  | -1.57670000 | 2.01233100  |
| H  | 3.22851400  | 0.03980800  | 2.29393900  |
| H  | 4.44803500  | 0.65483900  | -0.62151400 |

|                                              |             |             |             |   |             |             |             |
|----------------------------------------------|-------------|-------------|-------------|---|-------------|-------------|-------------|
| H                                            | 4.07724500  | 1.83870800  | 1.52240500  | C | -0.93735000 | -1.01822800 | 2.54912000  |
| H                                            | 4.28733800  | 3.01118600  | 0.22453300  | C | -2.30709000 | -0.58708900 | 2.00450400  |
| H                                            | 2.66041300  | 2.67379100  | 0.84098400  | P | -2.21793100 | -0.28383400 | 0.15050800  |
| H                                            | 2.92239800  | 1.02012900  | -2.60642900 | C | -3.00396200 | -1.79785100 | -0.63243300 |
| H                                            | 3.76121700  | 2.50454800  | -2.13677400 | C | -2.69525800 | -1.88322100 | -2.13664900 |
| H                                            | 2.05961200  | 2.26213100  | -1.68304400 | C | -4.49434400 | -2.02328500 | -0.34058900 |
| H                                            | 2.39811200  | -2.58894800 | -0.26102400 | C | -3.31776000 | 1.22774100  | -0.09509500 |
| H                                            | 4.57467000  | -2.05980400 | 0.92047200  | C | -4.66657600 | 1.25757400  | 0.64519800  |
| H                                            | 4.81847000  | -3.08410600 | -0.49739800 | C | -3.50504400 | 1.54866200  | -1.58796000 |
| H                                            | 5.20895900  | -1.36848200 | -0.57896000 | P | 2.31591100  | -0.18524200 | -0.00910700 |
| H                                            | 1.95805200  | -1.70496000 | -2.54280300 | C | 3.37172700  | -1.21021000 | -1.19550900 |
| H                                            | 3.28097700  | -2.88798300 | -2.54278800 | C | 2.67172800  | -1.34010600 | -2.55924200 |
| H                                            | 3.64649000  | -1.16699400 | -2.67368100 | C | 3.77401400  | -2.58920000 | -0.64899700 |
| H                                            | -4.32920800 | 0.52163700  | -1.10081600 | C | 3.27905900  | 1.43449500  | 0.11977300  |
| H                                            | -2.57804500 | 0.61937600  | -2.90604200 | C | 3.39065000  | 2.10107400  | -1.26454600 |
| H                                            | -3.49288000 | 2.13274200  | -2.81310900 | C | 4.66193800  | 1.33385400  | 0.78266700  |
| H                                            | -1.86071000 | 2.03316000  | -2.11610100 | H | 2.15593400  | -1.99548700 | 1.54596200  |
| H                                            | -4.24744800 | 2.06167500  | 0.85771300  | H | 3.46294700  | -0.92515200 | 2.10318000  |
| H                                            | -4.40526000 | 2.97061900  | -0.64867700 | H | 1.82837500  | 0.74497700  | 2.88133000  |
| H                                            | -2.83206100 | 2.88144500  | 0.16355300  | H | 1.39396000  | -0.81363500 | 3.57693500  |
| H                                            | -2.36402900 | -2.49935300 | 0.22518700  | H | -0.95490100 | -1.00829800 | 3.64968200  |
| H                                            | -2.03572100 | -2.13886900 | -2.20348200 | H | -0.68207500 | -2.02250200 | 2.20322000  |
| H                                            | -3.38561300 | -3.25019200 | -1.89981000 | H | -2.60592700 | 0.35601100  | 2.47787000  |
| H                                            | -3.71406100 | -1.58165700 | -2.37077400 | H | -3.06783600 | -1.33029400 | 2.26241500  |
| H                                            | -4.45803500 | -1.77215900 | 1.39348300  | H | -2.41903600 | -2.59141500 | -0.15443200 |
| H                                            | -4.81764000 | -2.99157900 | 0.16849500  | H | -1.62360300 | -1.77731500 | -2.31347800 |
| H                                            | -5.17514200 | -1.29542000 | -0.15173200 | H | -3.00865700 | -2.86331700 | -2.51431300 |
| H                                            | 0.01435200  | -1.41299300 | -0.86942000 | H | -3.23028200 | -1.12165000 | -2.71320200 |
| <b>INT5</b>                                  |             |             |             | H | -4.74163100 | -1.93520200 | 0.72231100  |
| $E_{\text{gas}} = -2097.4228460$ a.u.        |             |             |             | H | -4.77385700 | -3.03522600 | -0.65650900 |
| $E_{\text{solv}} = -2099.2465706$ a.u.       |             |             |             | H | -5.13061500 | -1.32639800 | -0.89531600 |
| Zero-point energy correction = 0.558491 a.u. |             |             |             | H | -2.69308400 | 2.01715000  | 0.34344800  |
| Co                                           | 0.04489000  | -0.11987500 | -0.09298400 | H | -4.56822200 | 1.03572300  | 1.71146000  |
| Cl                                           | 0.19800200  | -2.69165600 | -0.17180900 | H | -5.10166400 | 2.26105200  | 0.56373500  |
| C                                            | 2.45105100  | -0.95337000 | 1.68629400  | H | -5.38661300 | 0.55473200  | 0.22021200  |
| C                                            | 1.46469100  | -0.25794000 | 2.63310500  | H | -2.56045500 | 1.50957200  | -2.13908500 |
| N                                            | 0.10578100  | -0.09800600 | 2.03327600  | H | -3.93315800 | 2.55137000  | -1.70614400 |
|                                              |             |             |             | H | -4.19688000 | 0.84639000  | -2.06281300 |



|                                              |             |             |             |   |             |             |             |
|----------------------------------------------|-------------|-------------|-------------|---|-------------|-------------|-------------|
| H                                            | 4.28924700  | -0.62286700 | -1.33119000 | N | 0.08866200  | 0.22914400  | 1.85075100  |
| H                                            | 2.43097500  | -0.36497700 | -2.99276600 | C | -0.99844800 | -0.54594700 | 2.49841100  |
| H                                            | 3.32835900  | -1.87018600 | -3.25996400 | C | -2.37200800 | -0.09543100 | 1.98537000  |
| H                                            | 1.74042400  | -1.90126900 | -2.45271400 | P | -2.48652300 | -0.15725500 | 0.11602200  |
| H                                            | 4.34756300  | -2.51755000 | 0.28055000  | C | -3.32115500 | -1.80613200 | -0.23666600 |
| H                                            | 4.40690300  | -3.09546200 | -1.38751000 | C | -3.27273100 | -2.14505000 | -1.73722900 |
| H                                            | 2.89074400  | -3.20746600 | -0.47231400 | C | -4.72791000 | -2.02989600 | 0.33865200  |
| H                                            | 2.64112400  | 2.06497200  | 0.75243900  | C | -3.62662800 | 1.29174700  | -0.26588900 |
| H                                            | 2.43514300  | 2.11264400  | -1.79997500 | C | -4.91929100 | 1.41217600  | 0.55796300  |
| H                                            | 3.75080900  | 3.13229200  | -1.16495300 | C | -3.91734700 | 1.40884100  | -1.77157800 |
| H                                            | 4.10535600  | 1.57442000  | -1.90557400 | P | 2.59032500  | -0.17414700 | 0.00751200  |
| H                                            | 4.60309300  | 0.98038700  | 1.81590000  | C | 3.76559700  | -1.37159800 | -0.86438500 |
| H                                            | 5.14154400  | 2.31979900  | 0.80305800  | C | 3.37202100  | -1.48769600 | -2.34845600 |
| H                                            | 5.32870600  | 0.65962700  | 0.23357800  | C | 3.84622900  | -2.76121000 | -0.21297100 |
| H                                            | 0.65673500  | 2.75379300  | 1.65685500  | C | 3.58924700  | 1.41786200  | 0.16545400  |
| B                                            | -0.11785100 | 3.52168500  | 1.11463700  | C | 3.93404600  | 1.96692500  | -1.23074400 |
| H                                            | 0.16212500  | 4.67799700  | 1.33748400  | C | 4.84263400  | 1.33189100  | 1.04828600  |
| H                                            | -1.27738100 | 3.26543600  | 1.36639200  | H | 2.02705800  | -1.80052400 | 1.69285300  |
| N                                            | 0.07822200  | 3.30595600  | -0.49281600 | H | 3.36056700  | -0.81461200 | 2.30941800  |
| H                                            | 1.05953500  | 3.47271600  | -0.71158700 | H | 1.81224400  | 1.11952800  | 2.62528400  |
| H                                            | -0.08624700 | 2.32093700  | -0.75542700 | H | 1.27384800  | -0.28756200 | 3.53783500  |
| C                                            | -0.75721800 | 4.19606300  | -1.33652700 | H | -0.95917500 | -0.40501600 | 3.58829200  |
| H                                            | -0.52186500 | 5.23104600  | -1.08480100 | H | -0.82910000 | -1.60747300 | 2.29148200  |
| H                                            | -0.57928500 | 4.01663400  | -2.40035100 | H | -2.53480900 | 0.94704000  | 2.27966300  |
| H                                            | -1.80548500 | 4.01077500  | -1.10305900 | H | -3.15429000 | -0.69417500 | 2.46256600  |
| H                                            | -0.19089700 | 0.86007900  | 2.22747400  | H | -2.62678000 | -2.49494800 | 0.26067300  |
| H                                            | -0.04801000 | 0.32819700  | -1.54279600 | H | -2.25592400 | -2.06321300 | -2.12738800 |
| <b>TSS-7</b>                                 |             |             |             | H | -3.60690700 | -3.17737900 | -1.89148900 |
| $E_{\text{gas}} = -2097.388207$ a.u.         |             |             |             | H | -3.93167100 | -1.49695100 | -2.32360800 |
| $E_{\text{solv}} = -2099.2065932$ a.u.       |             |             |             | H | -4.81038700 | -1.75618600 | 1.39509300  |
| Zero-point energy correction = 0.553402 a.u. |             |             |             | H | -4.98965400 | -3.09148900 | 0.25657000  |
| <b>Three lowest frequencies:</b>             |             |             |             | H | -5.48578900 | -1.46797800 | -0.21522100 |
| <b>-426.7848      35.4520      42.1335</b>   |             |             |             | H | -2.97559900 | 2.12929400  | 0.01841400  |
| Co                                           | 0.05823600  | -0.16258200 | -0.27231100 | H | -4.74290700 | 1.31977700  | 1.63319300  |
| Cl                                           | 0.11592200  | -2.49401900 | -0.45107900 | H | -5.36753800 | 2.39837300  | 0.38748100  |
| C                                            | 2.41209500  | -0.77946600 | 1.76292400  | H | -5.66181200 | 0.66301900  | 0.27130400  |
| C                                            | 1.41370900  | 0.10575100  | 2.52296400  | H | -3.00939000 | 1.32476700  | -2.37588100 |
|                                              |             |             |             | H | -4.37406000 | 2.38148500  | -1.98778400 |

|                                                |             |             |             |   |             |             |             |
|------------------------------------------------|-------------|-------------|-------------|---|-------------|-------------|-------------|
| H                                              | -4.62018400 | 0.63962400  | -2.10716100 | C | -1.20010500 | -1.93410600 | -1.79343700 |
| H                                              | 4.75964100  | -0.90992600 | -0.80335200 | C | -2.44595000 | -1.04510500 | -1.68649000 |
| H                                              | 3.33887700  | -0.51345300 | -2.84590400 | P | -2.25018400 | -0.08803300 | -0.11574700 |
| H                                              | 4.10107700  | -2.10925900 | -2.88171200 | C | -3.29132300 | 1.46140700  | -0.24301500 |
| H                                              | 2.38697100  | -1.95261800 | -2.44714700 | C | -4.78317800 | 1.24217500  | -0.53773000 |
| H                                              | 4.21895200  | -2.71717100 | 0.81466700  | C | -2.64887200 | 2.41803000  | -1.26326300 |
| H                                              | 4.53797700  | -3.38924000 | -0.78654600 | C | -2.91389900 | -1.16277900 | 1.28089900  |
| H                                              | 2.86949400  | -3.25260000 | -0.20976600 | C | -4.16236900 | -2.00522500 | 0.97679600  |
| H                                              | 2.88341400  | 2.11550100  | 0.63430200  | C | -3.07810000 | -0.33220900 | 2.56589400  |
| H                                              | 3.05402700  | 2.02752000  | -1.87948900 | P | 2.25016900  | -0.08804200 | -0.11549600 |
| H                                              | 4.35917300  | 2.97308600  | -1.14565300 | C | 3.29137800  | 1.46131900  | -0.24351100 |
| H                                              | 4.67679200  | 1.34180700  | -1.73830500 | C | 2.64836200  | 2.41800400  | -1.26332900 |
| H                                              | 4.60517500  | 1.06070200  | 2.08062800  | C | 4.78296600  | 1.24171800  | -0.53937800 |
| H                                              | 5.34680300  | 2.30498300  | 1.07662200  | C | 2.91400200  | -1.16222400 | 1.28154600  |
| H                                              | 5.56558600  | 0.60273800  | 0.66591000  | C | 3.07854800  | -0.33110900 | 2.56614500  |
| H                                              | 0.82166200  | 2.81130100  | 1.49539300  | C | 4.16235600  | -2.00490900 | 0.97766700  |
| B                                              | -0.08303500 | 3.26976800  | 0.79960000  | H | 2.43910500  | -0.31416300 | -2.50104600 |
| H                                              | -0.07184500 | 4.48737100  | 0.88638200  | H | 3.37369600  | -1.62160800 | -1.75366600 |
| H                                              | -1.17384400 | 2.84544500  | 1.18094500  | H | 1.34310400  | -2.83993800 | -1.16945500 |
| N                                              | 0.16308700  | 2.82320000  | -0.69939800 | H | 1.11132000  | -2.30411000 | -2.82944000 |
| H                                              | 1.14489600  | 2.98329900  | -0.92097800 | H | -1.34331700 | -2.83969600 | -1.16968300 |
| H                                              | 0.03821300  | 1.36993700  | -1.46098300 | H | -1.11110400 | -2.30397000 | -2.82963600 |
| C                                              | -0.63555700 | 3.58158700  | -1.67130300 | H | -3.37359700 | -1.62104700 | -1.75456000 |
| H                                              | -0.41222700 | 4.65598000  | -1.63028300 | H | -2.43851400 | -0.31365200 | -2.50143100 |
| H                                              | -0.47260100 | 3.22863800  | -2.69931200 | H | -3.18186500 | 1.92133500  | 0.74634500  |
| H                                              | -1.69664100 | 3.46249000  | -1.43598700 | H | -5.28935900 | 0.68922200  | 0.25760200  |
| H                                              | -0.15681500 | 1.22949100  | 1.85132400  | H | -5.28827900 | 2.21049900  | -0.63509600 |
| H                                              | -0.01664700 | 0.65627800  | -1.91689500 | H | -4.93482500 | 0.69968800  | -1.47739400 |
| <b>INT6</b>                                    |             |             |             | H | -1.60110700 | 2.60692700  | -1.01770600 |
| $E_{\text{gas}} = -1973.810996$ a.u.           |             |             |             | H | -3.18163800 | 3.37571800  | -1.25813800 |
| $E_{\text{solv}} = -1975.4399985$ a.u.         |             |             |             | H | -2.70101400 | 2.01999900  | -2.28302700 |
| Zero-point energy correction = 0.44316500 a.u. |             |             |             | H | -2.07709700 | -1.85548400 | 1.44256100  |
| Co                                             | 0.00001900  | 0.09241900  | -0.06587900 | H | -4.01582500 | -2.67063500 | 0.12132600  |
| Cl                                             | -0.00010300 | 1.75019900  | 1.51197400  | H | -4.39722000 | -2.63483800 | 1.84334800  |
| C                                              | 2.44612200  | -1.04550400 | -1.68599300 | H | -5.04138300 | -1.38624200 | 0.77630400  |
| C                                              | 1.20016800  | -1.93430800 | -1.79321000 | H | -2.18620200 | 0.26440800  | 2.77775300  |
| N                                              | 0.00005500  | -1.19201800 | -1.42235200 | H | -3.25953300 | -0.99794300 | 3.41733300  |
|                                                |             |             |             | H | -3.93459400 | 0.34744600  | 2.49556600  |

|                                               |             |             |             |   |             |             |             |
|-----------------------------------------------|-------------|-------------|-------------|---|-------------|-------------|-------------|
| H                                             | 3.18283300  | 1.92132900  | 0.74591000  | C | -4.36801700 | -1.94267700 | -1.00671400 |
| H                                             | 1.60091200  | 2.60739500  | -1.01681500 | C | -5.04253900 | -1.20800700 | 1.32088100  |
| H                                             | 3.18158000  | 3.37544400  | -1.25896700 | H | -1.93414500 | 1.63819000  | 1.76632700  |
| H                                             | 2.69929900  | 2.01971000  | -2.28305600 | H | -3.29406100 | 0.73837500  | 2.44725100  |
| H                                             | 5.28958700  | 0.68845300  | 0.25545700  | H | -1.81678700 | -1.33388700 | 2.52445600  |
| H                                             | 5.28827600  | 2.20991500  | -0.63694300 | H | -1.27513000 | -0.03119300 | 3.58181400  |
| H                                             | 4.93373800  | 0.69938100  | -1.47927400 | H | 0.86276300  | 0.53709000  | 3.52820200  |
| H                                             | 2.07713000  | -1.85474200 | 1.44364600  | H | 0.73968900  | 1.53998400  | 2.06970900  |
| H                                             | 2.18682100  | 0.26579300  | 2.77791100  | H | 2.50719900  | -0.94359900 | 2.42684200  |
| H                                             | 3.25999000  | -0.99650000 | 3.41785400  | H | 3.09109900  | 0.71145300  | 2.51650100  |
| H                                             | 3.93520200  | 0.34829300  | 2.49535100  | H | 2.61636900  | 2.34374000  | 0.22997000  |
| H                                             | 4.01576200  | -2.67057400 | 0.12240500  | H | 2.41919400  | 1.80878800  | -2.15108700 |
| H                                             | 4.39717900  | -2.63424900 | 1.84441900  | H | 3.70028600  | 2.99628900  | -1.88240800 |
| H                                             | 5.04140500  | -1.38603800 | 0.77696400  | H | 4.12889900  | 1.31930900  | -2.22714300 |
| <b>INT7</b>                                   |             |             |             | H | 4.75466100  | 1.78612000  | 1.53050100  |
| $E_{\text{gas}} = -2096.264602$ a.u.          |             |             |             | H | 4.95148600  | 3.06558900  | 0.33198300  |
| $E_{\text{solv}} = -2098.0539877$ a.u.        |             |             |             | H | 5.54786000  | 1.44412100  | -0.01382200 |
| Zero-point energy correction = 0.5377220 a.u. |             |             |             | H | 3.31730100  | -2.26278700 | 0.13633100  |
| Co                                            | -0.11969300 | -0.18821600 | -0.30352400 | H | 4.61148100  | -1.45097500 | 2.13479600  |
| Cl                                            | -0.08367600 | 2.10610200  | -0.77492600 | H | 5.62715700  | -2.31691000 | 0.98697200  |
| C                                             | -2.38547000 | 0.64494400  | 1.84375500  | H | 5.70013900  | -0.55577600 | 1.06821800  |
| C                                             | -1.40869400 | -0.31910000 | 2.52977700  | H | 3.83849200  | -1.32951600 | -2.16557100 |
| N                                             | -0.08166500 | -0.38140100 | 1.85862600  | H | 5.13528800  | -2.32441700 | -1.49351000 |
| C                                             | 0.94273900  | 0.52701600  | 2.43080900  | H | 5.28571800  | -0.56688100 | -1.49535700 |
| C                                             | 2.34909300  | 0.06762900  | 2.03322500  | H | -4.87928600 | 1.04924100  | -0.48753600 |
| P                                             | 2.60924800  | -0.01040700 | 0.17307100  | H | -3.74468200 | 0.46980700  | -2.66435900 |
| C                                             | 3.37649800  | 1.67447400  | -0.19324600 | H | -4.31175400 | 2.14418300  | -2.65127700 |
| C                                             | 3.40594000  | 1.95501200  | -1.70677300 | H | -2.59108200 | 1.78764100  | -2.39570900 |
| C                                             | 4.73017100  | 1.99878100  | 0.45702900  | H | -3.96614300 | 2.79864900  | 1.01756400  |
| C                                             | 3.93470100  | -1.35967000 | 0.03653600  | H | -4.35484400 | 3.48724600  | -0.56042100 |
| C                                             | 5.02270900  | -1.41175100 | 1.12277000  | H | -2.66774800 | 3.14727300  | -0.14621900 |
| C                                             | 4.57725700  | -1.39048600 | -1.36160900 | H | -3.19919500 | -2.17757500 | 0.76343600  |
| P                                             | -2.72598900 | 0.06935400  | 0.09850300  | H | -3.54384500 | -2.13174700 | -1.70184000 |
| C                                             | -3.85010400 | 1.38685700  | -0.66527000 | H | -4.90282300 | -2.88844600 | -0.86626000 |
| C                                             | -3.60805900 | 1.44427900  | -2.18510700 | H | -5.06199400 | -1.24356000 | -1.48621000 |
| C                                             | -3.69347500 | 2.78300500  | -0.04202000 | H | -4.71125100 | -0.95270300 | 2.33180600  |
| C                                             | -3.86990700 | -1.41415600 | 0.35033800  | H | -5.63082700 | -2.13027400 | 1.39698500  |
|                                               |             |             |             | H | -5.72268500 | -0.41852100 | 0.98221900  |

|   |             |             |             |
|---|-------------|-------------|-------------|
| H | -0.95806900 | -2.71215800 | 0.54820100  |
| B | -0.07785200 | -2.95262100 | -0.27581800 |
| H | -0.23922100 | -4.06875900 | -0.73834700 |
| H | 1.02958900  | -2.85706600 | 0.24479700  |
| N | -0.18142600 | -1.85423800 | -1.43470200 |
| H | -1.11822100 | -1.90274900 | -1.82971000 |
| C | 0.77656700  | -2.05641900 | -2.53132700 |
| H | 0.62823200  | -3.03470900 | -3.00715100 |
| H | 0.68994400  | -1.27162300 | -3.29198900 |
| H | 1.78827100  | -2.03482300 | -2.12474500 |
| H | 0.25243300  | -1.34433100 | 1.92436200  |

**INT8 (1a)**

$E_{\text{gas}} = -2096.260382$  a.u.

$E_{\text{solv}} = -2098.0535789$  a.u.

Zero-point energy correction = 0.5362610 a.u.

|    |             |             |             |
|----|-------------|-------------|-------------|
| Co | -0.01597300 | 0.40910200  | 0.64422100  |
| Cl | 0.04116400  | -0.69276200 | 2.70436600  |
| C  | -2.18801300 | -0.11378100 | -1.94809500 |
| C  | -1.38196300 | 1.17735200  | -2.18292900 |
| N  | -0.03218200 | 1.12427400  | -1.59782700 |
| C  | 0.96482200  | 0.52520700  | -2.49546700 |
| C  | 2.35125200  | 0.47884700  | -1.83619700 |
| P  | 2.25971400  | -0.32435500 | -0.15481700 |
| C  | 2.67346900  | -2.14302100 | -0.40144700 |
| C  | 4.10480800  | -2.48167400 | -0.84552200 |
| C  | 1.65352400  | -2.78412500 | -1.35821200 |
| C  | 3.64244000  | 0.47261500  | 0.83960800  |
| C  | 4.97324900  | 0.73786900  | 0.11694300  |
| C  | 3.83745800  | -0.27148900 | 2.17274700  |
| P  | -2.25887500 | -0.45996500 | -0.11908000 |
| C  | -2.97786900 | -2.19048000 | 0.10854700  |
| C  | -1.88460900 | -3.20198500 | 0.49009400  |
| C  | -3.82381400 | -2.70654900 | -1.06717700 |
| C  | -3.59048400 | 0.70444900  | 0.52461100  |
| C  | -3.59641200 | 0.68689500  | 2.06347300  |
| C  | -5.00032000 | 0.50062900  | -0.04827800 |
| H  | -1.68474800 | -0.96275800 | -2.42534600 |

|   |             |             |             |
|---|-------------|-------------|-------------|
| H | -3.17759900 | -0.03003400 | -2.40946700 |
| H | -1.90207300 | 2.02356500  | -1.72360800 |
| H | -1.33706200 | 1.38689800  | -3.26361800 |
| H | 0.25395700  | 2.10240100  | -1.33446700 |
| H | 1.03283300  | 1.09179000  | -3.43966500 |
| H | 0.64219400  | -0.48730000 | -2.76303400 |
| H | 2.70186100  | 1.50409500  | -1.67324200 |
| H | 3.07549900  | -0.00621800 | -2.49916300 |
| H | 2.50579300  | -2.56420000 | 0.59778600  |
| H | 4.84953200  | -2.19880800 | -0.09940900 |
| H | 4.19485500  | -3.56319000 | -1.00378400 |
| H | 4.36632700  | -1.99338700 | -1.79129900 |
| H | 0.62582800  | -2.52496400 | -1.09210200 |
| H | 1.74426000  | -3.87549000 | -1.32712100 |
| H | 1.83086100  | -2.47332600 | -2.39409900 |
| H | 3.19402700  | 1.44562100  | 1.07782800  |
| H | 4.83955200  | 1.28676900  | -0.82012300 |
| H | 5.61645900  | 1.34800200  | 0.76198600  |
| H | 5.51846500  | -0.18178200 | -0.10798400 |
| H | 2.88778700  | -0.40219000 | 2.69946400  |
| H | 4.51135600  | 0.30262900  | 2.81836400  |
| H | 4.29051600  | -1.25825300 | 2.02505800  |
| H | -3.63390400 | -2.07119200 | 0.98032600  |
| H | -1.27060200 | -2.83788700 | 1.31803000  |
| H | -2.34359300 | -4.15365500 | 0.78315600  |
| H | -1.22655400 | -3.41074200 | -0.36091600 |
| H | -4.64479300 | -2.03497100 | -1.33011000 |
| H | -4.26023300 | -3.67819200 | -0.80750500 |
| H | -3.21206200 | -2.85858800 | -1.96302700 |
| H | -3.22536700 | 1.69104200  | 0.21187500  |
| H | -2.60017600 | 0.87036500  | 2.47311700  |
| H | -4.27612200 | 1.45912200  | 2.44069700  |
| H | -3.94595100 | -0.27541600 | 2.45454000  |
| H | -5.02274000 | 0.53358600  | -1.14227700 |
| H | -5.66461100 | 1.29305400  | 0.31584100  |
| H | -5.43085900 | -0.45345900 | 0.27277000  |

|   |             |            |             |   |             |             |             |
|---|-------------|------------|-------------|---|-------------|-------------|-------------|
| B | 0.15938500  | 2.81108300 | 1.00084400  | C | -4.60157000 | 1.39029200  | -0.11995700 |
| H | -0.06906100 | 3.46258400 | 1.99964100  | H | -1.90807100 | -1.16747000 | -2.21822700 |
| H | -0.88601300 | 2.11981600 | 0.80380100  | H | -3.30637000 | -0.07345100 | -2.26011100 |
| N | 0.48376800  | 3.58467100 | -0.29108800 | H | -1.84951000 | 1.89432200  | -2.07779300 |
| H | 1.44527700  | 3.91587700 | -0.25073700 | H | -1.26472500 | 0.89921200  | -3.40352200 |
| C | -0.38086200 | 4.73949900 | -0.54187400 | H | 0.14529800  | 1.81771200  | -1.24210900 |
| H | -0.37523700 | 5.48111100 | 0.27406300  | H | 1.14500100  | 1.04540300  | -3.42266100 |
| H | -0.10474200 | 5.25352800 | -1.47201600 | H | 0.93883700  | -0.58142000 | -2.73405700 |
| H | -1.41824400 | 4.40045500 | -0.65071500 | H | 2.56862500  | 1.72816400  | -1.53602000 |
| H | 1.08588900  | 2.02011900 | 1.25001000  | H | 3.23944200  | 0.28528700  | -2.28723900 |

### TS8-9

$E_{\text{gas}} = -2096.250864$  a.u.

$E_{\text{solv}} = -2098.0375908$  a.u.

Zero-point energy correction = 0.5371830 a.u.

Three lowest frequencies:

**-149.8052**      **36.4210**      **44.9105**

|    |             |             |             |   |             |             |             |
|----|-------------|-------------|-------------|---|-------------|-------------|-------------|
| Co | 0.02052600  | -0.31097200 | 0.22580600  | H | 5.40901400  | -1.33360600 | 0.17623300  |
| Cl | 0.06411400  | -2.46002600 | -0.78087100 | H | 2.60776800  | 1.93024200  | 1.02823000  |
| C  | -2.29864500 | -0.21318500 | -1.85373900 | H | 4.67535900  | 1.81256300  | -0.45652000 |
| C  | -1.37794100 | 0.93309700  | -2.31106300 | H | 4.98965700  | 2.37972500  | 1.18533800  |
| N  | -0.05091200 | 0.90352200  | -1.65311600 | H | 5.41925800  | 0.73316000  | 0.72872300  |
| C  | 1.08620000  | 0.47291400  | -2.48141700 | H | 2.30807000  | 0.32822000  | 2.89396700  |
| C  | 2.39562800  | 0.65698900  | -1.69770900 | H | 3.65638400  | 1.43778000  | 3.17735500  |
| P  | 2.32580100  | -0.15196500 | 0.00002700  | H | 3.98267600  | -0.22963000 | 2.69839200  |
| C  | 3.29231600  | -1.75165100 | -0.21211500 | H | -2.60762500 | -2.65890300 | -0.38351700 |
| C  | 3.14498700  | -2.66764100 | 1.01514400  | H | -4.87297900 | -1.69055500 | -0.98849200 |
| C  | 4.76074200  | -1.64068100 | -0.64951600 | H | -4.98468000 | -3.10581800 | 0.06152600  |
| C  | 3.27573200  | 1.06272500  | 1.07498400  | H | -5.22901700 | -1.49616900 | 0.73711300  |
| C  | 4.66590300  | 1.51308900  | 0.59615200  | H | -1.74106500 | -2.58427500 | 1.89764800  |
| C  | 3.30381900  | 0.61505500  | 2.54495400  | H | -3.20965500 | -3.56881500 | 1.83062400  |
| P  | -2.26764100 | -0.37547700 | 0.00554800  | H | -3.27629200 | -1.94391900 | 2.52020000  |
| C  | -3.13707100 | -2.01125600 | 0.32387800  | H | -2.61774700 | 1.89874800  | 0.50927900  |
| C  | -4.63922900 | -2.06625900 | 0.01247300  | H | -2.63240600 | 0.73310700  | 2.69939200  |
| C  | -2.82057900 | -2.54874200 | 1.73005100  | H | -3.97376500 | 1.87294600  | 2.53954200  |
| C  | -3.30760900 | 1.05801100  | 0.64175500  | H | -4.27603500 | 0.14055700  | 2.38060000  |
| C  | -3.55820300 | 0.93521400  | 2.15364500  | H | -4.42716600 | 1.56121000  | -1.18651300 |

|                                                |             |             |             |   |             |             |             |
|------------------------------------------------|-------------|-------------|-------------|---|-------------|-------------|-------------|
| H                                              | -5.03605400 | 2.31098400  | 0.28838800  | C | 4.34608300  | 1.65154900  | -0.63174600 |
| H                                              | -5.35564700 | 0.60515000  | -0.02596900 | H | 2.07432000  | -0.49756500 | 2.32921700  |
| B                                              | 0.01143200  | 2.67098400  | 1.46572300  | H | 3.34669800  | 0.69398400  | 1.98917600  |
| H                                              | 0.91129500  | 2.48987600  | 2.23453200  | H | 1.70723100  | 2.38224800  | 1.35155200  |
| H                                              | -1.11510500 | 2.67534400  | 1.87276500  | H | 1.21955300  | 1.73315800  | 2.91220000  |
| N                                              | 0.28412600  | 3.46714800  | 0.29457600  | H | -0.28225200 | 1.94350000  | 0.66958500  |
| H                                              | 1.24069000  | 3.75460900  | 0.13230600  | H | -1.21390100 | 1.61380200  | 2.95471000  |
| C                                              | -0.67888600 | 4.30080600  | -0.40982700 | H | -0.82883300 | -0.10403500 | 2.68101700  |
| H                                              | -1.69010300 | 4.00281400  | -0.12166000 | H | -2.70480700 | 1.65535500  | 1.00482500  |
| H                                              | -0.57060800 | 5.36720000  | -0.16355400 | H | -3.19437400 | 0.33910100  | 2.06312000  |
| H                                              | -0.59902200 | 4.21130500  | -1.50351800 | H | -2.64179200 | -2.26071700 | 1.37333700  |
| H                                              | -0.01866100 | 0.98683400  | 1.08162600  | H | -1.78953000 | -3.34505900 | -0.63881400 |
| <b>INT9</b>                                    |             |             |             | H | -3.29313900 | -4.11647800 | -0.11635800 |
| $E_{\text{gas}} = -2096.268755$ a.u.           |             |             |             | H | -3.30953300 | -3.03510400 | -1.51303200 |
| $E_{\text{solv}} = -2098.04156760$ a.u.        |             |             |             | H | -4.89336000 | -1.00751300 | 1.33227800  |
| Zero-point energy correction = 0.52775800 a.u. |             |             |             | H | -5.02398500 | -2.76417400 | 1.22388100  |
| Co                                             | 0.06354800  | -0.63461400 | -0.18353400 | H | -5.22858600 | -1.78065500 | -0.22364900 |
| Cl                                             | 0.14659800  | -2.34583700 | 1.48277200  | H | -2.39848300 | 1.32613600  | -1.53637800 |
| C                                              | 2.35257800  | 0.34440300  | 1.68825100  | H | -4.60616300 | 1.45226800  | -0.25348800 |
| C                                              | 1.32750000  | 1.48162200  | 1.84749000  | H | -4.77341100 | 1.65715400  | -1.99999900 |
| N                                              | 0.00805400  | 1.16181400  | 1.25167400  | H | -5.21445900 | 0.12576200  | -1.24798400 |
| C                                              | -1.08517200 | 0.83498900  | 2.18303300  | H | -1.91670300 | -0.62410000 | -2.98383100 |
| C                                              | -2.39636400 | 0.67713700  | 1.39472500  | H | -3.25308600 | 0.35063300  | -3.62303700 |
| P                                              | -2.19367900 | -0.48791500 | -0.07506500 | H | -3.59502500 | -1.18393300 | -2.82093100 |
| C                                              | -3.15196300 | -2.02313600 | 0.43132800  | H | 2.95611700  | -2.35967500 | 0.96238400  |
| C                                              | -2.86539200 | -3.19346600 | -0.52456400 | H | 5.07942200  | -0.96568000 | 1.14936700  |
| C                                              | -4.65548400 | -1.87182800 | 0.70391800  | H | 5.37199300  | -2.60496200 | 0.56100600  |
| C                                              | -3.05649800 | 0.44901000  | -1.46253300 | H | 5.38725400  | -1.25427600 | -0.57151800 |
| C                                              | -4.49073400 | 0.94387600  | -1.21615200 | H | 2.07348400  | -3.05285500 | -1.20857800 |
| C                                              | -2.94524700 | -0.30286600 | -2.79841300 | H | 3.66242400  | -3.78297400 | -0.93112200 |
| P                                              | 2.29671100  | -0.35869300 | -0.04155900 | H | 3.50471300  | -2.42627700 | -2.05226900 |
| C                                              | 3.38922200  | -1.88049200 | 0.07561900  | H | 2.26139700  | 1.72021700  | -1.13777200 |
| C                                              | 4.88788200  | -1.65135500 | 0.31819400  | H | 2.29070100  | 0.01845500  | -2.94414900 |
| C                                              | 3.13963300  | -2.83511000 | -1.10455800 | H | 3.45257800  | 1.32249000  | -3.24187900 |
| C                                              | 3.06353600  | 0.97009700  | -1.13422400 | H | 4.02702400  | -0.24895800 | -2.67992200 |
| C                                              | 3.21472400  | 0.47913900  | -2.58333700 | H | 4.23892200  | 2.04972800  | 0.38185500  |

|   |             |            |             |
|---|-------------|------------|-------------|
| H | 4.59465000  | 2.49468600 | -1.28773000 |
| H | 5.20271200  | 0.97280500 | -0.63489900 |
| B | -0.35451100 | 4.17065200 | -1.30693700 |
| H | -0.98132100 | 3.70702200 | -2.21129800 |
| H | 0.81506500  | 4.40816000 | -1.39313600 |
| N | -1.00925200 | 4.44331900 | -0.10659100 |
| H | -2.00625300 | 4.27657800 | -0.04447600 |
| C | -0.44898900 | 5.07261400 | 1.08356000  |
| H | 0.61776300  | 5.24369600 | 0.92631700  |
| H | -0.92529700 | 6.03901500 | 1.28803000  |
| H | -0.57209800 | 4.44146800 | 1.97207500  |
| H | 0.03798000  | 0.19418600 | -1.43646500 |

### INT10

$E_{\text{gas}} = -1974.368122$  a.u.

$E_{\text{solv}} = -1976.0212299$  a.u.

Zero-point energy correction = 0.4572360 a.u.

|    |             |             |             |
|----|-------------|-------------|-------------|
| Co | -0.00189500 | -0.02051500 | -0.33038400 |
| Cl | -0.05162800 | -2.30724500 | -0.55022900 |
| C  | 2.34567700  | 1.80522800  | 0.67326700  |
| C  | 1.36231100  | 2.67417000  | -0.11683600 |
| N  | 0.01802300  | 2.02708100  | -0.24041800 |
| C  | -0.98002100 | 2.50763000  | 0.75707800  |
| C  | -2.37245300 | 1.98182900  | 0.38202000  |
| P  | -2.20790400 | 0.16901000  | -0.08830300 |
| C  | -2.92086300 | -0.81367300 | 1.34710400  |
| C  | -4.42554000 | -0.68676000 | 1.62244800  |
| C  | -2.10685200 | -0.51154800 | 2.61684600  |
| C  | -3.36173800 | -0.03468500 | -1.57141000 |
| C  | -4.72528400 | 0.67618000  | -1.54617700 |
| C  | -3.49721900 | -1.52464500 | -1.93231800 |
| P  | 2.19070900  | 0.07125100  | -0.00687900 |
| C  | 3.02068800  | -1.04618400 | 1.25533800  |
| C  | 2.08287400  | -1.24857500 | 2.45735200  |
| C  | 4.42834600  | -0.63083500 | 1.70963100  |
| C  | 3.26459500  | 0.04881300  | -1.56866000 |
| C  | 3.46834100  | -1.40452200 | -2.03293200 |

|   |             |             |             |
|---|-------------|-------------|-------------|
| C | 4.58097200  | 0.84123100  | -1.57582500 |
| H | 2.05860800  | 1.76719900  | 1.72980200  |
| H | 3.35280700  | 2.23120200  | 0.62059700  |
| H | 1.74423400  | 2.81503700  | -1.13355500 |
| H | 1.26174700  | 3.67332200  | 0.32897700  |
| H | -0.34456600 | 2.27914800  | -1.16104900 |
| H | -0.97948200 | 3.60793400  | 0.79873700  |
| H | -0.67425800 | 2.13275300  | 1.73678500  |
| H | -2.74647600 | 2.53409900  | -0.48892400 |
| H | -3.08199500 | 2.16108500  | 1.19579000  |
| H | -2.69241500 | -1.84499100 | 1.05079200  |
| H | -5.03306200 | -1.06480700 | 0.79759400  |
| H | -4.68885700 | -1.26870100 | 2.51420600  |
| H | -4.72259600 | 0.35092400  | 1.81593400  |
| H | -1.03481100 | -0.61401500 | 2.43100700  |
| H | -2.38863400 | -1.20563700 | 3.41694900  |
| H | -2.30071900 | 0.50358200  | 2.98578200  |
| H | -2.76173100 | 0.43438900  | -2.36424800 |
| H | -4.64116100 | 1.74527800  | -1.32635900 |
| H | -5.20184600 | 0.58468300  | -2.53007800 |
| H | -5.40825000 | 0.23930400  | -0.81403200 |
| H | -2.52255700 | -2.01985700 | -1.95969800 |
| H | -3.97336200 | -1.62887000 | -2.91434900 |
| H | -4.12511000 | -2.05569300 | -1.20830300 |
| H | 3.08268000  | -2.00821900 | 0.73280100  |
| H | 1.11560900  | -1.63355100 | 2.12863600  |
| H | 2.52578900  | -1.96664300 | 3.15788500  |
| H | 1.92080700  | -0.31459900 | 3.00952300  |
| H | 5.14986900  | -0.62249200 | 0.88944900  |
| H | 4.79888500  | -1.33602800 | 2.46334200  |
| H | 4.42969900  | 0.36380800  | 2.16985300  |
| H | 2.59207100  | 0.52194100  | -2.29670600 |
| H | 2.52619300  | -1.96103300 | -2.02910500 |
| H | 3.87670800  | -1.41891500 | -3.05021200 |
| H | 4.18028300  | -1.93300900 | -1.38896900 |
| H | 4.44484500  | 1.89056700  | -1.29366700 |

|   |            |            |             |
|---|------------|------------|-------------|
| H | 5.00848800 | 0.83166300 | -2.58608500 |
| H | 5.33015800 | 0.41080400 | -0.90574400 |

**INT11**

$E_{\text{gas}} = -2096.834072$  a.u.

$E_{\text{solv}} = -2098.640081$  a.u.

Zero-point energy correction = 0.55113300 a.u.

|    |             |             |             |
|----|-------------|-------------|-------------|
| Co | 0.04373200  | -0.00843900 | -0.04759900 |
| Cl | -0.05584600 | 0.47821400  | -2.30460400 |
| C  | 2.38767700  | -0.97789000 | 1.79216500  |
| C  | 1.41914200  | -0.14642700 | 2.63615300  |
| N  | 0.07109800  | -0.06339400 | 2.00047900  |
| C  | -0.89477300 | -1.05375000 | 2.54776900  |
| C  | -2.29648400 | -0.77596300 | 1.99476600  |
| P  | -2.15806800 | -0.43100200 | 0.15970800  |
| C  | -2.66620700 | -2.02055700 | -0.71386400 |
| C  | -4.11540900 | -2.49359500 | -0.53236000 |
| C  | -1.67951100 | -3.14212800 | -0.34533500 |
| C  | -3.50720200 | 0.85144900  | -0.16659900 |
| C  | -4.84502300 | 0.69928300  | 0.57737300  |
| C  | -3.71501400 | 1.04139600  | -1.67954800 |
| P  | 2.26315600  | -0.32738200 | 0.04587000  |
| C  | 3.15774000  | -1.58296200 | -1.04593400 |
| C  | 2.15718200  | -2.50743400 | -1.75803900 |
| C  | 4.24143300  | -2.40625800 | -0.32786500 |
| C  | 3.39821100  | 1.18783600  | 0.05088100  |
| C  | 3.33175900  | 1.90002200  | -1.31263200 |
| C  | 4.85666000  | 0.97839100  | 0.48420100  |
| H  | 2.07390600  | -2.02748700 | 1.77546400  |
| H  | 3.39612100  | -0.94411100 | 2.21734300  |
| H  | 1.78960000  | 0.87875000  | 2.72669500  |
| H  | 1.33459600  | -0.54932400 | 3.65457400  |
| H  | -0.11260400 | 2.22058500  | -0.23384200 |
| H  | -0.90272000 | -1.00890700 | 3.64713600  |
| H  | -0.55170500 | -2.05116900 | 2.25892100  |
| H  | -2.69635900 | 0.12666000  | 2.47018000  |
| H  | -2.97904200 | -1.59695800 | 2.23718400  |

|   |             |             |             |
|---|-------------|-------------|-------------|
| H | -2.50033400 | -1.77084300 | -1.76934500 |
| H | -4.83814700 | -1.80711900 | -0.97802500 |
| H | -4.25040900 | -3.46796800 | -1.01756800 |
| H | -4.37493900 | -2.62094500 | 0.52488300  |
| H | -0.64478300 | -2.80933900 | -0.46199900 |
| H | -1.84059400 | -4.01259500 | -0.99170100 |
| H | -1.82256300 | -3.47604500 | 0.68976200  |
| H | -3.02772300 | 1.75916500  | 0.22308200  |
| H | -4.71659900 | 0.59914500  | 1.65912300  |
| H | -5.45476100 | 1.59499700  | 0.40727500  |
| H | -5.42464800 | -0.15783200 | 0.22701800  |
| H | -2.76430000 | 1.16693000  | -2.20497900 |
| H | -4.33878400 | 1.92447500  | -1.86275900 |
| H | -4.23266100 | 0.18317200  | -2.12203700 |
| H | 3.64258400  | -0.96594000 | -1.81319500 |
| H | 1.39677000  | -1.93392600 | -2.29202500 |
| H | 2.68658300  | -3.15017300 | -2.47218700 |
| H | 1.64997700  | -3.16446600 | -1.04179000 |
| H | 4.98717500  | -1.78820800 | 0.17719500  |
| H | 4.76806300  | -3.03679900 | -1.05392400 |
| H | 3.80013500  | -3.07597800 | 0.41814400  |
| H | 2.91356500  | 1.83904900  | 0.79193000  |
| H | 2.30368700  | 2.01716000  | -1.66671600 |
| H | 3.80767900  | 2.88618300  | -1.24802200 |
| H | 3.86994400  | 1.33485600  | -2.08198500 |
| H | 4.94433200  | 0.47844300  | 1.45375900  |
| H | 5.36176500  | 1.94803400  | 0.57133400  |
| H | 5.41317700  | 0.39127200  | -0.25330200 |
| B | -0.33215600 | 3.40132500  | 1.60976400  |
| H | -0.34302400 | 4.58714300  | 1.85252600  |
| H | -1.40464300 | 2.86991100  | 1.84366300  |
| N | -0.07142600 | 3.22947500  | 0.01705500  |
| H | 0.88509400  | 3.51061000  | -0.19520300 |
| C | -0.99278400 | 3.98116700  | -0.86953200 |
| H | -0.86006500 | 5.04946100  | -0.69055100 |
| H | -0.80373200 | 3.73662000  | -1.91720400 |



|                                                |             |             |             |   |             |             |             |
|------------------------------------------------|-------------|-------------|-------------|---|-------------|-------------|-------------|
| H                                              | -2.01690800 | 3.71018300  | -0.61146400 | H | 3.53243100  | 0.86916000  | 1.60945100  |
| H                                              | 0.59643500  | 2.83731500  | 2.16690800  | H | 5.36950100  | -0.18490400 | 0.28410500  |
| H                                              | -0.28815900 | 0.87532300  | 2.20433800  | H | 5.44255700  | -0.72755600 | 1.96066800  |
| <b>INT11'</b>                                  |             |             |             | H | 4.78736800  | -1.79880000 | 0.72355400  |
| E <sub>gas</sub> = -2096.783493 a.u.           |             |             |             | H | 1.81719100  | -0.51472500 | 2.79393200  |
| E <sub>solv</sub> = -2098.6106319 a.u.         |             |             |             | H | 3.46031700  | -0.77161900 | 3.43033800  |
| Zero-point energy correction = 0.55303300 a.u. |             |             |             | H | 2.68988400  | -1.97698700 | 2.38440800  |
| Co                                             | -0.01446300 | -0.02151600 | 0.07630500  | H | 2.26034300  | 1.15255800  | -2.09616700 |
| Cl                                             | -0.30709100 | -2.21753800 | 1.49887700  | H | 3.69289100  | -0.68122200 | -2.92024600 |
| C                                              | -2.29113600 | -1.57870300 | -1.31710200 | H | 4.51374900  | 0.86582600  | -3.11881500 |
| C                                              | -1.19076600 | -1.38133600 | -2.35558300 | H | 4.99351800  | -0.22422700 | -1.81683500 |
| N                                              | 0.10859700  | -1.05653300 | -1.69358700 | H | 2.98832900  | 2.67009800  | -0.22290400 |
| C                                              | 0.97652100  | -2.26112500 | -1.51968000 | H | 3.96514100  | 2.84924400  | -1.68883300 |
| C                                              | 2.27975700  | -1.92750300 | -0.76123400 | H | 4.60299700  | 1.96534400  | -0.30090300 |
| P                                              | 2.24148400  | -0.17479600 | -0.10727000 | H | -4.48151500 | 0.07712300  | 0.86938400  |
| C                                              | 3.43471400  | -0.19195100 | 1.34887000  | H | -2.86254800 | 1.21967600  | 2.42230600  |
| C                                              | 4.83424400  | -0.75397000 | 1.04872900  | H | -3.81981900 | -0.00719200 | 3.26764800  |
| C                                              | 2.80759300  | -0.90419400 | 2.55880000  | H | -2.13834600 | -0.35036200 | 2.79590300  |
| C                                              | 3.11022500  | 0.85950400  | -1.46378400 | H | -4.33767700 | -2.36248700 | 0.41574900  |
| C                                              | 4.13283200  | 0.15733100  | -2.37260000 | H | -4.62379900 | -2.05063800 | 2.12994100  |
| C                                              | 3.69597800  | 2.15753300  | -0.88213700 | H | -2.99720900 | -2.50345000 | 1.58071800  |
| P                                              | -2.31409300 | -0.06627200 | -0.22469200 | H | -2.57093400 | 1.49253800  | -2.05380200 |
| C                                              | -3.55870300 | -0.44291500 | 1.15825300  | H | -2.82488800 | 2.88004200  | 0.05303900  |
| C                                              | -3.06237600 | 0.14583200  | 2.48911400  | H | -4.08180400 | 3.21137500  | -1.14184300 |
| C                                              | -3.89332700 | -1.93434300 | 1.31994400  | H | -4.43844500 | 2.21892000  | 0.27285400  |
| C                                              | -3.29345600 | 1.18610800  | -1.28548800 | H | -4.29521500 | -0.15273800 | -2.71559800 |
| C                                              | -3.67440300 | 2.43919000  | -0.47926300 | H | -5.05960100 | 1.42533900  | -2.53550100 |
| C                                              | -4.54073500 | 0.62725300  | -1.99007800 | H | -5.25562800 | 0.20601600  | -1.27479200 |
| H                                              | -2.02806600 | -2.40733800 | -0.65476300 | B | 0.24616700  | 1.98415700  | 1.85732100  |
| H                                              | -3.24602800 | -1.80276600 | -1.80149000 | H | 1.41221900  | 2.03996300  | 2.15701500  |
| H                                              | -1.44050500 | -0.54813700 | -3.02240100 | H | -0.50270400 | 2.35466100  | 2.72915800  |
| H                                              | -1.07516000 | -2.27414000 | -2.98519500 | N | 0.03191100  | 2.94751300  | 0.57771000  |
| H                                              | 1.19290300  | -2.69714400 | -2.50557500 | H | 0.44804900  | 2.42441600  | -0.21175500 |
| H                                              | 0.39591300  | -2.96943600 | -0.92866200 | C | 0.55422800  | 4.32715900  | 0.72902000  |
| H                                              | 3.16612900  | -2.14017500 | -1.36368100 | H | 1.62571700  | 4.27451300  | 0.92344600  |
| H                                              | 2.31809800  | -2.55180400 | 0.13482100  | H | 0.36767400  | 4.92391100  | -0.16792900 |

|   |             |             |             |
|---|-------------|-------------|-------------|
| H | 0.06937500  | 4.79042500  | 1.59015800  |
| H | -0.10721000 | 0.82401600  | 1.56216500  |
| H | 0.59631800  | -0.41110200 | -2.31227000 |
| H | -0.96283000 | 2.96802400  | 0.35732700  |

**TS11-12**

$E_{\text{gas}} = -2096.785962$  a.u.

$E_{\text{solv}} = -2098.5760743$  a.u.

Zero-point energy correction = 0.535221 a.u.

Three lowest frequencies:

**-153.6012**      **29.4739**      **32.2128**

|    |             |             |             |
|----|-------------|-------------|-------------|
| Co | 0.02023900  | -0.22202500 | -0.34933300 |
| C  | 2.35239700  | -0.70492900 | 1.83839200  |
| C  | 1.37666200  | 0.29351400  | 2.47599400  |
| N  | 0.05296700  | 0.33440500  | 1.79908600  |
| C  | -1.00619400 | -0.46876800 | 2.45774500  |
| C  | -2.39585600 | -0.08697100 | 1.92065800  |
| P  | -2.50542400 | -0.19030000 | 0.04839700  |
| C  | -3.42236900 | -1.79841500 | -0.27762800 |
| C  | -3.35511800 | -2.18163100 | -1.76603600 |
| C  | -4.85069700 | -1.92247400 | 0.27351400  |
| C  | -3.52915900 | 1.32619900  | -0.39406700 |
| C  | -4.87447600 | 1.51402300  | 0.32588300  |
| C  | -3.68262400 | 1.47340800  | -1.91750800 |
| P  | 2.50583800  | -0.35680800 | 0.01221300  |
| C  | 3.68990600  | -1.65335100 | -0.68699300 |
| C  | 3.31508100  | -1.95203200 | -2.15049100 |
| C  | 3.74019500  | -2.95189500 | 0.13354000  |
| C  | 3.46066100  | 1.26315000  | -0.07317100 |
| C  | 3.74931300  | 1.62790200  | -1.53953500 |
| C  | 4.73463500  | 1.33363100  | 0.78166300  |
| H  | 1.95426200  | -1.72066200 | 1.91628000  |
| H  | 3.30988600  | -0.67561000 | 2.36988500  |
| H  | 1.78907400  | 1.30599000  | 2.42802200  |
| H  | 1.24577100  | 0.05545500  | 3.54076300  |
| H  | -0.98846200 | -0.30366400 | 3.54572800  |
| H  | -0.79562800 | -1.52600900 | 2.27041000  |
| H  | -2.61620200 | 0.94820900  | 2.20412000  |

|   |             |             |             |
|---|-------------|-------------|-------------|
| H | -3.15320300 | -0.71794300 | 2.39670600  |
| H | -2.77323300 | -2.50387000 | 0.25641700  |
| H | -2.32290100 | -2.18261400 | -2.12374900 |
| H | -3.75680200 | -3.19197500 | -1.90309800 |
| H | -3.94870700 | -1.50596400 | -2.39058200 |
| H | -4.93873200 | -1.60011200 | 1.31570000  |
| H | -5.16810600 | -2.97093100 | 0.22811400  |
| H | -5.56430600 | -1.34296000 | -0.31943700 |
| H | -2.85805200 | 2.12526200  | -0.04954800 |
| H | -4.79157800 | 1.39438200  | 1.41008900  |
| H | -5.25012400 | 2.52689700  | 0.13826900  |
| H | -5.63129100 | 0.81273100  | -0.03436600 |
| H | -2.72656800 | 1.35479100  | -2.43703700 |
| H | -4.07897900 | 2.46641900  | -2.15821900 |
| H | -4.38216600 | 0.73679100  | -2.32534200 |
| H | 4.68748200  | -1.19503600 | -0.66569900 |
| H | 3.29975700  | -1.04902400 | -2.76801600 |
| H | 4.04347500  | -2.64463600 | -2.58885500 |
| H | 2.32513900  | -2.41422900 | -2.20108600 |
| H | 4.10387600  | -2.78681500 | 1.15214000  |
| H | 4.42541900  | -3.65852300 | -0.34949600 |
| H | 2.75373100  | -3.42104100 | 0.18521100  |
| H | 2.73956200  | 1.99663000  | 0.30969100  |
| H | 2.84096500  | 1.58465100  | -2.14784400 |
| H | 4.15499700  | 2.64421000  | -1.60163300 |
| H | 4.49160900  | 0.95574400  | -1.98389700 |
| H | 4.53239700  | 1.18127000  | 1.84591500  |
| H | 5.20245700  | 2.31991400  | 0.67745500  |
| H | 5.47641700  | 0.58946400  | 0.47079500  |
| B | -0.24336400 | 3.65743700  | 0.94373000  |
| H | -0.42322500 | 4.84696600  | 1.16678400  |
| N | -0.05030800 | 3.47336800  | -0.55075500 |
| H | -0.48250600 | 2.70098300  | -1.05662400 |
| C | 0.82208400  | 4.29501100  | -1.35266500 |
| H | 1.61600600  | 4.71892000  | -0.73150400 |
| H | 1.26336300  | 3.72310000  | -2.17401100 |
| H | 0.25873900  | 5.13592300  | -1.78782300 |
| H | -0.24586800 | 1.31398600  | 1.78185500  |

|    |             |             |             |
|----|-------------|-------------|-------------|
| Cl | 0.02168200  | -2.62483600 | -0.27092200 |
| H  | -1.17052600 | 2.96665500  | 1.33323400  |
| H  | 0.80786300  | 3.37411900  | 1.53131500  |
| H  | 0.27521400  | 1.07581800  | -1.30126100 |

**TS11-12<sub>B</sub>**

$E_{\text{gas}} = -2096.773461$  a.u.

$E_{\text{solv}} = -2098.5881996$  a.u.

Zero-point energy correction = 0.55351800 a.u.

Three lowest frequencies:

**-95.3865            26.8419            37.9343**

|    |             |             |             |
|----|-------------|-------------|-------------|
| Co | -0.00818900 | -0.10497300 | -0.02589700 |
| Cl | 0.02769700  | -1.65428800 | -1.98497100 |
| C  | 2.16137900  | -1.84268200 | 1.19498500  |
| C  | 1.25133800  | -1.50271500 | 2.37480000  |
| N  | -0.00055300 | -0.79883800 | 1.93137700  |
| C  | -1.22414200 | -1.57084100 | 2.27275700  |
| C  | -2.46987700 | -0.75446400 | 1.93367800  |
| P  | -2.29123900 | -0.11505000 | 0.18351500  |
| C  | -3.28087100 | -1.33230200 | -0.87447700 |
| C  | -4.81197100 | -1.21551200 | -0.84430000 |
| C  | -2.86400600 | -2.77937200 | -0.55434500 |
| C  | -3.25996300 | 1.51559300  | 0.25108300  |
| C  | -4.58596500 | 1.55187200  | 1.03228000  |
| C  | -3.41463300 | 2.12875100  | -1.15214400 |
| P  | 2.27976100  | -0.32749400 | 0.11801600  |
| C  | 3.48032500  | -0.77016200 | -1.27277000 |
| C  | 3.15819600  | 0.03131500  | -2.54618400 |
| C  | 3.53803000  | -2.27581200 | -1.58134100 |
| C  | 3.31625200  | 0.85233900  | 1.19411100  |
| C  | 3.74361200  | 2.09657800  | 0.39746000  |
| C  | 4.52970800  | 0.22357100  | 1.89751200  |
| H  | 1.69251100  | -2.60706900 | 0.56897900  |
| H  | 3.12093500  | -2.22952300 | 1.55341300  |
| H  | 1.77815600  | -0.85599800 | 3.08556500  |
| H  | 0.97560700  | -2.41051500 | 2.92313600  |
| H  | -1.21744900 | -1.84064000 | 3.34003500  |
| H  | -1.19688100 | -2.49573300 | 1.69219800  |

|   |             |             |             |
|---|-------------|-------------|-------------|
| H | -2.53706800 | 0.10855100  | 2.60822400  |
| H | -3.37409700 | -1.35225700 | 2.08672400  |
| H | -2.91481600 | -1.11590100 | -1.88478900 |
| H | -5.17818500 | -0.25738700 | -1.21878700 |
| H | -5.24289600 | -1.99702600 | -1.48141300 |
| H | -5.21512600 | -1.36563100 | 0.16407800  |
| H | -1.78256500 | -2.90241200 | -0.63565600 |
| H | -3.32721500 | -3.45359800 | -1.28363300 |
| H | -3.21315900 | -3.09172100 | 0.43806500  |
| H | -2.55231700 | 2.13831200  | 0.81972700  |
| H | -4.49218300 | 1.13898500  | 2.04118800  |
| H | -4.91664700 | 2.59272500  | 1.13715000  |
| H | -5.38287200 | 1.00925600  | 0.52173700  |
| H | -2.46818700 | 2.16262100  | -1.69846300 |
| H | -3.80644400 | 3.15080700  | -1.07780600 |
| H | -4.12415400 | 1.55845900  | -1.75890300 |
| H | 4.46872800  | -0.46333800 | -0.90453300 |
| H | 3.14872800  | 1.10996200  | -2.37185900 |
| H | 3.91455800  | -0.18282400 | -3.31133900 |
| H | 2.17598200  | -0.25599100 | -2.92888100 |
| H | 3.87460600  | -2.86727100 | -0.72387900 |
| H | 4.25392100  | -2.44452400 | -2.39482500 |
| H | 2.55997400  | -2.63944700 | -1.90574100 |
| H | 2.60509100  | 1.18194300  | 1.96489700  |
| H | 2.91202300  | 2.54014500  | -0.15642800 |
| H | 4.16014800  | 2.85484400  | 1.07155100  |
| H | 4.52215000  | 1.85108600  | -0.33205900 |
| H | 4.24904100  | -0.57882400 | 2.58617700  |
| H | 5.06319500  | 0.98315200  | 2.48214900  |
| H | 5.24430700  | -0.19019600 | 1.17778600  |
| B | 0.27110300  | 2.52458900  | -1.63515700 |
| H | -0.46492900 | 3.07058900  | -2.42670300 |
| H | 1.44145900  | 2.69812100  | -1.87672100 |
| N | -0.00983200 | 3.20846200  | -0.17663000 |
| H | -1.01612800 | 3.19447400  | -0.01906400 |
| C | 0.50977500  | 4.58291300  | 0.00714100  |
| H | 0.08478400  | 5.21879600  | -0.77150500 |
| H | 0.25456300  | 4.98310900  | 0.99309500  |

|   |             |            |             |
|---|-------------|------------|-------------|
| H | 1.59281900  | 4.56493700 | -0.11530000 |
| H | -0.00767300 | 1.33500800 | -1.48462500 |
| H | -0.05678900 | 0.08532500 | 2.43443400  |
| H | 0.37097700  | 2.53722000 | 0.50443600  |

**TS11-12<sub>N</sub>**

E<sub>gas</sub> = -2096.773453 a.u.

E<sub>solv</sub> = -2098.58461420 a.u.

Zero-point energy correction = 0.54889200 a.u.

**Three lowest frequencies:**

**-847.1970            35.6207            40.3107**

|    |             |             |             |
|----|-------------|-------------|-------------|
| Co | 0.02069100  | 0.03126000  | -0.09277900 |
| Cl | 0.26120000  | -2.52792800 | -0.64586700 |
| C  | 2.27938500  | -1.01517000 | 1.76084100  |
| C  | 1.17136600  | -0.43798400 | 2.64072000  |
| N  | -0.12881000 | -0.37415100 | 1.90361100  |
| C  | -1.00168300 | -1.56119200 | 2.16490200  |
| C  | -2.26764700 | -1.56512900 | 1.27847700  |
| P  | -2.23441800 | -0.16415800 | 0.04355300  |
| C  | -3.35106100 | -0.71445900 | -1.36273900 |
| C  | -4.67252400 | -1.34521200 | -0.89257300 |
| C  | -2.61841900 | -1.62545800 | -2.35899600 |
| C  | -3.15220800 | 1.28871600  | 0.88084700  |
| C  | -4.02290100 | 0.93548300  | 2.09761400  |
| C  | -3.94972100 | 2.13792200  | -0.12493800 |
| P  | 2.30597300  | -0.04605000 | 0.16999800  |
| C  | 3.49589300  | -0.93464200 | -1.00168800 |
| C  | 2.96051000  | -0.87842000 | -2.44284600 |
| C  | 3.83180900  | -2.37736200 | -0.59219700 |
| C  | 3.26819500  | 1.53430400  | 0.60374000  |
| C  | 3.68928400  | 2.30224700  | -0.66545700 |
| C  | 4.48547200  | 1.32662300  | 1.51904200  |
| H  | 2.03030900  | -2.03946500 | 1.47280400  |
| H  | 3.23217900  | -1.02326700 | 2.29793400  |
| H  | 1.42397600  | 0.58326300  | 2.94654800  |
| H  | 1.04909700  | -1.02896200 | 3.55826700  |
| H  | -1.26564700 | -1.58098400 | 3.23148200  |
| H  | -0.40251800 | -2.43923900 | 1.92601400  |

|   |             |             |             |
|---|-------------|-------------|-------------|
| H | -3.18093700 | -1.57968400 | 1.87737900  |
| H | -2.24267700 | -2.46839500 | 0.66433200  |
| H | -3.57771100 | 0.22250800  | -1.88319400 |
| H | -5.24248900 | -0.69294700 | -0.22443400 |
| H | -5.30542200 | -1.56179500 | -1.76088500 |
| H | -4.49992000 | -2.29365600 | -0.37380400 |
| H | -1.71283100 | -1.15151200 | -2.73966400 |
| H | -3.28607500 | -1.83861700 | -3.20285400 |
| H | -2.31536100 | -2.57229000 | -1.90683700 |
| H | -2.32142000 | 1.91191500  | 1.23704900  |
| H | -3.45516600 | 0.44127800  | 2.89232800  |
| H | -4.44776200 | 1.85188000  | 2.52457300  |
| H | -4.85990000 | 0.28200100  | 1.83189800  |
| H | -3.36365200 | 2.38830100  | -1.01291200 |
| H | -4.26166000 | 3.07606200  | 0.34851800  |
| H | -4.85732100 | 1.62266400  | -0.45492200 |
| H | 4.42367700  | -0.35125300 | -0.94985600 |
| H | 2.74588500  | 0.14347700  | -2.76835400 |
| H | 3.70404300  | -1.30390700 | -3.12756100 |
| H | 2.03728600  | -1.45774100 | -2.51883900 |
| H | 4.30282400  | -2.43152100 | 0.39484200  |
| H | 4.54145400  | -2.79509900 | -1.31626000 |
| H | 2.93377900  | -2.99926700 | -0.59375400 |
| H | 2.53341900  | 2.14907900  | 1.14113900  |
| H | 2.88718800  | 2.39428100  | -1.40378900 |
| H | 4.02424900  | 3.31131900  | -0.39930800 |
| H | 4.52644900  | 1.80793200  | -1.16812800 |
| H | 4.21014200  | 0.93351100  | 2.50186600  |
| H | 5.00123500  | 2.28062700  | 1.68258700  |
| H | 5.21163300  | 0.63765000  | 1.07319800  |
| B | -0.14895100 | 1.69895000  | -2.05943000 |
| H | -1.31509800 | 1.73655200  | -2.37964400 |
| H | 0.60826300  | 1.84774800  | -2.99648500 |
| N | 0.11270600  | 2.69393200  | -0.86835100 |
| H | -0.06245700 | 1.60995300  | 0.06777400  |
| C | -0.61461300 | 3.96608300  | -0.88522700 |
| H | -1.68810600 | 3.77431200  | -0.83337100 |
| H | -0.33399500 | 4.59294800  | -0.03079800 |

|                                                |             |             |             |    |             |             |             |
|------------------------------------------------|-------------|-------------|-------------|----|-------------|-------------|-------------|
| H                                              | -0.42796700 | 4.53598600  | -1.80799900 | H  | -1.53830200 | -2.82156000 | -1.33734100 |
| H                                              | 0.11095100  | 0.47655800  | -1.69190100 | H  | -2.88390200 | -3.89835800 | -0.92519100 |
| H                                              | -0.61786700 | 0.44772900  | 2.25264500  | H  | -3.16310200 | -2.52189800 | -1.99627100 |
| H                                              | 1.10419200  | 2.88261400  | -0.76292400 | H  | -4.70007700 | -1.43830200 | 1.32486400  |
| <b>INT12</b>                                   |             |             |             | H  | -4.67063900 | -3.11360000 | 0.77145400  |
| $E_{\text{gas}} = -2096.820884$ a.u.           |             |             |             | H  | -5.06249100 | -1.82556200 | -0.36426400 |
| $E_{\text{solv}} = -2098.62560270$ a.u.        |             |             |             | H  | -2.68337300 | 1.76182400  | -1.00124400 |
| Zero-point energy correction = 0.54935200 a.u. |             |             |             | H  | -4.71726100 | 1.39685300  | 0.49155200  |
| Co                                             | 0.08218700  | -0.16521000 | -0.20360800 | H  | -5.09539400 | 1.95174000  | -1.14036800 |
| C                                              | 2.45010700  | 0.04724000  | 1.79103000  | H  | -5.34590200 | 0.26192400  | -0.70826600 |
| C                                              | 1.40257400  | 1.06803600  | 2.26300800  | H  | -2.21272800 | 0.20997000  | -2.87917900 |
| N                                              | 0.07156400  | 0.90069500  | 1.61215400  | H  | -3.66449800 | 1.18740600  | -3.15185100 |
| C                                              | -1.00983700 | 0.39356100  | 2.48499500  | H  | -3.82496700 | -0.51041200 | -2.69541800 |
| C                                              | -2.35010100 | 0.44042200  | 1.73276300  | H  | 4.34380200  | -1.14264600 | -0.95024800 |
| P                                              | -2.18078300 | -0.28965900 | 0.00752500  | H  | 2.55024000  | -1.72975400 | -2.58550000 |
| C                                              | -2.93241300 | -2.00692600 | 0.12595800  | H  | 3.44034000  | -3.17157800 | -2.06578400 |
| C                                              | -2.60618100 | -2.85515900 | -1.11490600 | H  | 1.82473700  | -2.82314200 | -1.40205800 |
| C                                              | -4.42415700 | -2.08432100 | 0.48536800  | H  | 4.35037400  | -2.01960400 | 1.37559500  |
| C                                              | -3.25075500 | 0.82733500  | -1.05552200 | H  | 4.46467700  | -3.32727600 | 0.19449800  |
| C                                              | -4.67974500 | 1.11551800  | -0.56545900 | H  | 2.92335500  | -3.01404300 | 1.01169400  |
| C                                              | -3.23216300 | 0.39481000  | -2.53055200 | H  | 2.66971300  | 2.19986900  | -0.50855800 |
| P                                              | 2.34609900  | -0.13012400 | -0.06570800 | H  | 2.37133700  | 1.11231700  | -2.72718600 |
| C                                              | 3.42051100  | -1.60002800 | -0.57345900 | H  | 3.78463500  | 2.17645000  | -2.69837500 |
| C                                              | 2.76533400  | -2.37525500 | -1.72936000 | H  | 4.00590200  | 0.42695300  | -2.62088200 |
| C                                              | 3.80699800  | -2.53924400 | 0.58012200  | H  | 4.65455000  | 1.74056100  | 0.93069300  |
| C                                              | 3.29755400  | 1.33722400  | -0.75620400 | H  | 5.16385300  | 2.43030900  | -0.61135200 |
| C                                              | 3.36345700  | 1.25061900  | -2.29082700 | H  | 5.35616000  | 0.70265800  | -0.31840900 |
| C                                              | 4.69156800  | 1.55648600  | -0.14707400 | B  | -0.08295300 | 2.67119400  | -1.20524800 |
| H                                              | 2.21149500  | -0.93926400 | 2.19197300  | H  | -1.06521700 | 2.64835800  | -1.89764200 |
| H                                              | 3.44485300  | 0.33451700  | 2.14763500  | N  | -0.19921500 | 3.41653900  | 0.06305800  |
| H                                              | 1.74924700  | 2.08216600  | 2.03136400  | H  | 0.64845900  | 3.89284600  | 0.34834400  |
| H                                              | 1.29790000  | 1.01393000  | 3.35413200  | C  | -1.37890700 | 4.20794300  | 0.40158300  |
| H                                              | -1.08444300 | 0.99408500  | 3.40512800  | H  | -2.28406000 | 3.63602000  | 0.17908900  |
| H                                              | -0.76296500 | -0.63416300 | 2.76232100  | H  | -1.40019500 | 4.46074000  | 1.46968200  |
| H                                              | -2.66457400 | 1.48370800  | 1.61272500  | H  | -1.44795700 | 5.14998400  | -0.16367600 |
| H                                              | -3.12750000 | -0.06265000 | 2.31644700  | H  | -0.18959900 | 1.82994500  | 1.24260400  |
| H                                              | -2.35092100 | -2.42614000 | 0.95356400  | H  | 0.06642800  | -0.76725700 | -1.52919400 |
|                                                |             |             |             | Cl | 0.25094500  | -2.27777000 | 0.87905000  |

|                                                |             |             |             |   |             |             |             |
|------------------------------------------------|-------------|-------------|-------------|---|-------------|-------------|-------------|
| H                                              | 0.97546100  | 2.74730100  | -1.76474700 | H | -1.65238500 | -1.31154400 | -2.48196900 |
| H                                              | -0.01705000 | 1.18811500  | -0.95505300 | H | -3.00226800 | -2.41074600 | -2.80722100 |
| <b>INT12'</b>                                  |             |             |             | H | -3.29032500 | -0.66940700 | -2.76874200 |
| $E_{\text{gas}} = -2096.790847$ a.u.           |             |             |             | H | -4.70191900 | -1.99011700 | 0.54920600  |
| $E_{\text{solv}} = -2098.6074344$ a.u.         |             |             |             | H | -4.73749100 | -2.86997000 | -0.97902100 |
| Zero-point energy correction = 0.55514700 a.u. |             |             |             | H | -5.14252600 | -1.15672000 | -0.95001900 |
| Co                                             | 0.05409800  | 0.07481200  | -0.00544700 | H | -2.80519500 | 2.05576800  | 0.60397600  |
| Cl                                             | 0.17065400  | -2.40673000 | -0.54703700 | H | -4.48896600 | 0.90456700  | 2.04396400  |
| C                                              | 2.43359300  | -1.19714500 | 1.56097800  | H | -5.22077000 | 2.12057000  | 1.00075300  |
| C                                              | 1.47561600  | -0.63959300 | 2.62065200  | H | -5.39267200 | 0.40914000  | 0.60917600  |
| N                                              | 0.11852400  | -0.34538300 | 2.07546800  | H | -2.90171400 | 1.71532000  | -1.95050200 |
| C                                              | -0.93439900 | -1.32964200 | 2.41603900  | H | -4.21878600 | 2.69993600  | -1.27863800 |
| C                                              | -2.29361900 | -0.77868800 | 1.96551800  | H | -4.49951000 | 1.02141000  | -1.73763500 |
| P                                              | -2.21326800 | -0.19658300 | 0.17813700  | H | 4.23991600  | -0.39709700 | -1.41077300 |
| C                                              | -2.99602900 | -1.60486300 | -0.79833200 | H | 2.38150200  | 0.20910200  | -2.94925400 |
| C                                              | -2.71630900 | -1.47879400 | -2.30563800 | H | 3.19260500  | -1.27206700 | -3.48867300 |
| C                                              | -4.47501400 | -1.90977000 | -0.51883100 | H | 1.61765700  | -1.35840700 | -2.65653100 |
| C                                              | -3.41878900 | 1.26670900  | 0.15303800  | H | 4.27166900  | -2.53431800 | -0.14084600 |
| C                                              | -4.69831300 | 1.15558000  | 1.00099100  | H | 4.28836800  | -2.81631400 | -1.88460000 |
| C                                              | -3.77084400 | 1.69875900  | -1.28284700 | H | 2.78584400  | -3.05027000 | -0.96984700 |
| P                                              | 2.32631800  | -0.11567400 | 0.03823800  | H | 2.95504600  | 1.84526000  | 1.27909700  |
| C                                              | 3.30557800  | -0.96818600 | -1.34483000 | H | 2.56207400  | 2.65168600  | -1.02387500 |
| C                                              | 2.57620200  | -0.83681700 | -2.69201200 | H | 4.13464400  | 3.20188200  | -0.42993600 |
| C                                              | 3.68084600  | -2.43051800 | -1.05670900 | H | 4.04757300  | 1.87065000  | -1.58631300 |
| C                                              | 3.47160000  | 1.33051400  | 0.46189600  | H | 4.85496600  | 0.33495200  | 1.85440300  |
| C                                              | 3.55512700  | 2.31583300  | -0.71490800 | H | 5.45402600  | 1.84813100  | 1.17704500  |
| C                                              | 4.87823300  | 0.94331700  | 0.94616400  | H | 5.44130900  | 0.38896500  | 0.18751000  |
| H                                              | 2.10187800  | -2.18741300 | 1.24438900  | B | -0.01139600 | 2.07833700  | 0.52108600  |
| H                                              | 3.44315800  | -1.28081100 | 1.97609500  | H | 1.03418000  | 2.52802400  | 0.94276200  |
| H                                              | 1.87409200  | 0.29914700  | 3.02067500  | H | -0.91064200 | 2.31557100  | 1.31869300  |
| H                                              | 1.39792800  | -1.33737600 | 3.46545500  | N | -0.34485600 | 2.97171600  | -0.80375200 |
| H                                              | -0.95269400 | -1.52165900 | 3.50066400  | H | 0.34119100  | 2.68047800  | -1.50016700 |
| H                                              | -0.69798100 | -2.25944700 | 1.89411500  | C | -0.35949800 | 4.44622300  | -0.63625700 |
| H                                              | -2.54897700 | 0.09161600  | 2.58191600  | H | 0.61791200  | 4.75866000  | -0.26694900 |
| H                                              | -3.07934400 | -1.52423100 | 2.12262400  | H | -0.58468100 | 4.95838100  | -1.57724000 |
| H                                              | -2.39081300 | -2.44744100 | -0.44861300 | H | -1.11036100 | 4.70008200  | 0.11343300  |

|   |             |            |             |
|---|-------------|------------|-------------|
| H | -0.17165100 | 0.55507100 | 2.45069900  |
| H | -1.23428500 | 2.64193700 | -1.17585800 |
| H | -0.00166100 | 0.49389400 | -1.42930200 |

**TS12-13**

$E_{\text{gas}} = -2096.82018$  a.u.

$E_{\text{solv}} = -2098.6257203$  a.u.

Zero-point energy correction = 0.550027 a.u.

Three lowest frequencies:

**-64.1047**            **35.4437**            **43.0432**

|    |             |             |             |
|----|-------------|-------------|-------------|
| Co | 0.08521600  | -0.17015000 | -0.19992900 |
| C  | 2.45242400  | 0.07515800  | 1.78632600  |
| C  | 1.39678300  | 1.09189900  | 2.24949100  |
| N  | 0.06289700  | 0.90236300  | 1.60901900  |
| C  | -1.00399300 | 0.37691700  | 2.49018100  |
| C  | -2.35032300 | 0.39568700  | 1.74750200  |
| P  | -2.17228000 | -0.30527900 | 0.00875200  |
| C  | -2.91594000 | -2.02847800 | 0.08952300  |
| C  | -2.57131200 | -2.84951500 | -1.16441700 |
| C  | -4.40997200 | -2.12230300 | 0.43411300  |
| C  | -3.24771000 | 0.82850200  | -1.03134700 |
| C  | -4.68339500 | 1.08960500  | -0.54557200 |
| C  | -3.21423800 | 0.43500500  | -2.51705500 |
| P  | 2.34295200  | -0.12485200 | -0.06905100 |
| C  | 3.41943200  | -1.59841800 | -0.56476000 |
| C  | 2.75064000  | -2.39804900 | -1.69588000 |
| C  | 3.82492900  | -2.51390300 | 0.60106700  |
| C  | 3.28623300  | 1.33794100  | -0.77873900 |
| C  | 3.32264500  | 1.24760400  | -2.31411500 |
| C  | 4.69117600  | 1.55794800  | -0.19593300 |
| H  | 2.22499700  | -0.90888700 | 2.20012400  |
| H  | 3.44457400  | 0.37749700  | 2.13790300  |
| H  | 1.73201800  | 2.10536400  | 2.00016700  |
| H  | 1.29860400  | 1.05383900  | 3.34201800  |
| H  | -1.08239400 | 0.97741200  | 3.41004400  |
| H  | -0.73479400 | -0.64532900 | 2.76511400  |
| H  | -2.69837100 | 1.43018700  | 1.64530500  |
| H  | -3.10761400 | -0.13937500 | 2.32928800  |

|   |             |             |             |
|---|-------------|-------------|-------------|
| H | -2.33851500 | -2.45908700 | 0.91399700  |
| H | -1.50043900 | -2.80836200 | -1.37073900 |
| H | -2.84960500 | -3.89704200 | -1.00109500 |
| H | -3.11592100 | -2.49846800 | -2.04682500 |
| H | -4.69666500 | -1.48903900 | 1.27950800  |
| H | -4.65178400 | -3.15702600 | 0.70407000  |
| H | -5.04280600 | -1.85606800 | -0.41741500 |
| H | -2.69022700 | 1.76692000  | -0.94718900 |
| H | -4.73428700 | 1.33023700  | 0.52091800  |
| H | -5.09992700 | 1.94338800  | -1.09347700 |
| H | -5.34126500 | 0.23710000  | -0.72748600 |
| H | -2.19036800 | 0.27029900  | -2.86270600 |
| H | -3.65200000 | 1.23780600  | -3.12136700 |
| H | -3.79521100 | -0.47271700 | -2.70864000 |
| H | 4.33540300  | -1.14503100 | -0.96374100 |
| H | 2.52159500  | -1.77041300 | -2.56165900 |
| H | 3.42297100  | -3.19944200 | -2.02595400 |
| H | 1.81592400  | -2.84096400 | -1.34568200 |
| H | 4.37497800  | -1.97621700 | 1.37971100  |
| H | 4.48152900  | -3.30619200 | 0.22245100  |
| H | 2.94849600  | -2.98437400 | 1.05191500  |
| H | 2.66548600  | 2.20271100  | -0.52034400 |
| H | 2.32178800  | 1.11073600  | -2.73069200 |
| H | 3.73973700  | 2.17033400  | -2.73285000 |
| H | 3.95523200  | 0.42018300  | -2.65380900 |
| H | 4.67469000  | 1.72903700  | 0.88448000  |
| H | 5.14965700  | 2.43971400  | -0.65918100 |
| H | 5.35659000  | 0.70998200  | -0.39068400 |
| B | -0.09611100 | 2.73332700  | -1.20899100 |
| H | -1.07741600 | 2.67244600  | -1.89653900 |
| N | -0.21988400 | 3.46695200  | 0.04853500  |
| H | 0.62709800  | 3.91159200  | 0.38133900  |
| C | -1.40917900 | 4.21261700  | 0.44612500  |
| H | -2.30196700 | 3.69731800  | 0.08320600  |
| H | -1.49260500 | 4.29945300  | 1.53798100  |
| H | -1.43422300 | 5.23161200  | 0.03182600  |
| H | -0.21788000 | 1.82267000  | 1.24248100  |
| H | 0.07697100  | -0.77679000 | -1.52345900 |

|    |             |             |             |
|----|-------------|-------------|-------------|
| Cl | 0.25951500  | -2.28234100 | 0.90955800  |
| H  | -0.01511700 | 1.17022200  | -0.94866600 |
| H  | 0.97065000  | 2.77743900  | -1.75057600 |

**TS12'-10**

$E_{\text{gas}} = -2096.777950$  a.u.

$E_{\text{solv}} = -2098.5725259$  a.u.

Zero-point energy correction = 0.5400500 a.u.

**Three lowest frequencies:**

**-1453.2433            31.4416            38.2815**

|    |             |             |             |
|----|-------------|-------------|-------------|
| Co | 0.02583200  | -0.23884000 | -0.26542600 |
| C  | 2.34114800  | -0.62870300 | 1.81614900  |
| C  | 1.40291900  | 0.36252500  | 2.52349100  |
| N  | 0.05724400  | 0.42419100  | 1.90466300  |
| C  | -0.98371100 | -0.38428400 | 2.56752000  |
| C  | -2.35329900 | -0.10396500 | 1.92735300  |
| P  | -2.28833800 | -0.22210800 | 0.05137700  |
| C  | -3.22106100 | -1.80226300 | -0.35895200 |
| C  | -3.08075400 | -2.15407500 | -1.84938600 |
| C  | -4.67588400 | -1.93056700 | 0.11642800  |
| C  | -3.28035700 | 1.30099000  | -0.46015100 |
| C  | -4.71637900 | 1.44084800  | 0.07103700  |
| C  | -3.22454000 | 1.53026600  | -1.97988000 |
| P  | 2.32218400  | -0.31351300 | -0.02407000 |
| C  | 3.43738400  | -1.61603700 | -0.82271900 |
| C  | 2.87223400  | -2.00137500 | -2.20173200 |
| C  | 3.67104900  | -2.86516200 | 0.04160100  |
| C  | 3.31170300  | 1.28130800  | -0.22207100 |
| C  | 3.47088700  | 1.62660800  | -1.71256600 |
| C  | 4.66528000  | 1.32071500  | 0.50377300  |
| H  | 1.96740600  | -1.64864700 | 1.93682400  |
| H  | 3.34289800  | -0.57708600 | 2.25681700  |
| H  | 1.82424500  | 1.37286600  | 2.47634300  |
| H  | 1.33011200  | 0.10318000  | 3.59000100  |
| H  | -1.03631300 | -0.16282700 | 3.64627700  |
| H  | -0.71971400 | -1.43768600 | 2.44310100  |
| H  | -2.66779800 | 0.91554100  | 2.18131700  |
| H  | -3.10182900 | -0.78407600 | 2.34571500  |

|    |             |             |             |
|----|-------------|-------------|-------------|
| H  | -2.60665200 | -2.52626300 | 0.18904000  |
| H  | -2.03145100 | -2.14698700 | -2.15419700 |
| H  | -3.47410400 | -3.16113900 | -2.02929700 |
| H  | -3.64191700 | -1.46501700 | -2.49020800 |
| H  | -4.81864100 | -1.61437700 | 1.15443000  |
| H  | -4.98507300 | -2.98059700 | 0.05166700  |
| H  | -5.36417600 | -1.35400100 | -0.50820900 |
| H  | -2.68392000 | 2.08721900  | 0.02332700  |
| H  | -4.78954400 | 1.24039800  | 1.14387800  |
| H  | -5.07357000 | 2.46440900  | -0.09602900 |
| H  | -5.40600100 | 0.76887800  | -0.44505100 |
| H  | -2.20326600 | 1.44303400  | -2.36287700 |
| H  | -3.60898600 | 2.52719100  | -2.23020100 |
| H  | -3.84591100 | 0.80558100  | -2.51522600 |
| H  | 4.40633000  | -1.12186100 | -0.97086000 |
| H  | 2.74220100  | -1.13033200 | -2.85203000 |
| H  | 3.55526100  | -2.69607300 | -2.70549500 |
| H  | 1.90066400  | -2.48973700 | -2.08757300 |
| H  | 4.15522900  | -2.62639100 | 0.99347700  |
| H  | 4.32809200  | -3.55915700 | -0.49634500 |
| H  | 2.72826300  | -3.37816400 | 0.24688400  |
| H  | 2.65947200  | 2.03914400  | 0.23117900  |
| H  | 2.51023000  | 1.60618700  | -2.23548700 |
| H  | 3.90441100  | 2.62706900  | -1.82887700 |
| H  | 4.14461300  | 0.92436000  | -2.21546600 |
| H  | 4.56128700  | 1.19037000  | 1.58459000  |
| H  | 5.15401100  | 2.28826600  | 0.33696000  |
| H  | 5.34821800  | 0.54688900  | 0.13660200  |
| B  | -0.31928400 | 3.71263300  | 1.13112900  |
| H  | 0.73346900  | 3.85122900  | 1.67760100  |
| N  | -0.27948900 | 3.40013300  | -0.35785500 |
| H  | -0.09867300 | 2.27237300  | -0.61505200 |
| C  | 0.72279300  | 4.13874100  | -1.17074800 |
| H  | 1.69819500  | 4.03390200  | -0.69569300 |
| H  | 0.76629000  | 3.71892600  | -2.18083400 |
| H  | 0.46491000  | 5.19874100  | -1.21103000 |
| H  | -0.23776400 | 1.40762100  | 1.91305500  |
| Cl | 0.02922400  | -2.64277200 | 0.12058600  |



|                                                |             |             |             |    |             |             |             |
|------------------------------------------------|-------------|-------------|-------------|----|-------------|-------------|-------------|
| H                                              | -1.38952400 | 3.68543200  | 1.65960900  | H  | -1.79066000 | -2.36694800 | -1.98737900 |
| H                                              | 0.05423300  | 1.17295000  | -1.03804800 | H  | -3.26808300 | -3.34607100 | -1.92851100 |
| H                                              | -1.20149900 | 3.55190200  | -0.76588500 | H  | -3.34378400 | -1.68445000 | -2.52317900 |
| <b>INT13</b>                                   |             |             |             | H  | -4.85605800 | -1.51729500 | 0.98942000  |
| $E_{\text{gas}} = -2096.841035$ a.u.           |             |             |             | H  | -4.99887500 | -2.92838300 | -0.06018000 |
| $E_{\text{solv}} = -2098.6354269$ a.u.         |             |             |             | H  | -5.21722000 | -1.31428600 | -0.73177000 |
| Zero-point energy correction = 0.54592300 a.u. |             |             |             | H  | -2.40919400 | 2.01541600  | -0.20754700 |
| Co                                             | 0.03530100  | -0.34367300 | -0.15354100 | H  | -4.56437100 | 1.44055800  | 1.01279500  |
| C                                              | 2.43489700  | -0.65053300 | 1.78030400  | H  | -4.78437100 | 2.53060900  | -0.35699400 |
| C                                              | 1.42495400  | 0.21374000  | 2.55044400  | H  | -5.22657300 | 0.83091500  | -0.50854400 |
| N                                              | 0.07971700  | 0.26228300  | 1.89991300  | H  | -1.99660900 | 1.10584400  | -2.49664000 |
| C                                              | -1.01296800 | -0.44504200 | 2.61091400  | H  | -3.31412000 | 2.29730900  | -2.46978100 |
| C                                              | -2.35007800 | -0.11986700 | 1.92617400  | H  | -3.68622200 | 0.57763500  | -2.59380700 |
| P                                              | -2.19285100 | -0.30209300 | 0.05836600  | H  | 4.27648400  | -1.00697700 | -1.20296400 |
| C                                              | -3.13373900 | -1.87473200 | -0.34564700 | H  | 2.44989500  | -1.12419000 | -2.91684400 |
| C                                              | -2.86328500 | -2.33731600 | -1.78680700 | H  | 3.34535500  | -2.65216700 | -2.83469600 |
| C                                              | -4.63265500 | -1.89611700 | -0.01302600 | H  | 1.74393700  | -2.50156900 | -2.06624600 |
| C                                              | -3.07045200 | 1.22866700  | -0.59553700 | H  | 4.30146000  | -2.51829700 | 0.77805100  |
| C                                              | -4.48970100 | 1.51218800  | -0.07654400 | H  | 4.38845200  | -3.44106000 | -0.72553700 |
| C                                              | -3.00785500 | 1.30082800  | -2.12996600 | H  | 2.85784200  | -3.35468500 | 0.16466900  |
| P                                              | 2.26290300  | -0.32138500 | -0.04878200 | H  | 2.46940500  | 2.04025900  | 0.22840000  |
| C                                              | 3.35750500  | -1.55655100 | -0.96211800 | H  | 2.01203300  | 1.65544800  | -2.19098300 |
| C                                              | 2.68096200  | -1.98079600 | -2.27732500 | H  | 3.38621100  | 2.75691300  | -1.94943300 |
| C                                              | 3.74522900  | -2.78658000 | -0.12552400 | H  | 3.67231200  | 1.08289600  | -2.42632900 |
| C                                              | 3.10592100  | 1.33805900  | -0.32490500 | H  | 4.59569500  | 1.26523200  | 1.29367200  |
| C                                              | 3.03488100  | 1.72762500  | -1.81105200 | H  | 4.92389800  | 2.46469600  | 0.04172700  |
| C                                              | 4.53879500  | 1.45329600  | 0.21735000  | H  | 5.22208900  | 0.75736500  | -0.28117900 |
| H                                              | 2.18323200  | -1.70607100 | 1.90274000  | B  | -0.15307500 | 4.15549200  | 1.34174700  |
| H                                              | 3.44547400  | -0.48663900 | 2.16983300  | H  | -0.19498300 | 3.27932500  | 2.16352700  |
| H                                              | 1.79304700  | 1.24340200  | 2.61685200  | H  | -0.20598700 | 5.30467000  | 1.66909700  |
| H                                              | 1.32781400  | -0.15292400 | 3.57980100  | N  | -0.04219400 | 3.81259400  | 0.00310900  |
| H                                              | 0.01176500  | 1.05167600  | -0.61689300 | H  | 0.00176800  | 2.82825600  | -0.26266400 |
| H                                              | -1.05128400 | -0.14380900 | 3.66897100  | C  | 0.02235900  | 4.72736600  | -1.12924500 |
| H                                              | -0.80138900 | -1.51481400 | 2.55190500  | H  | 0.95965700  | 4.60724300  | -1.68519300 |
| H                                              | -2.62936800 | 0.91883600  | 2.14114000  | H  | -0.80532700 | 4.55594400  | -1.82757900 |
| H                                              | -3.14468900 | -0.75368700 | 2.33136000  | H  | -0.03692000 | 5.75614400  | -0.76776300 |
| H                                              | -2.61395900 | -2.58177900 | 0.31202300  | H  | -0.18325400 | 1.24409800  | 1.84834700  |
|                                                |             |             |             | Cl | 0.09181100  | -2.68820600 | 0.39184500  |

H -0.01513900 -0.61073800 -1.58002500

### TS13-10

$E_{\text{gas}} = -1975.516732$  a.u.

$E_{\text{solv}} = -1977.2009908$  a.u.

Zero-point energy correction = 0.4738720 a.u.

Three lowest frequencies:

-71.4530 25.5584 43.1304

Co -0.07396000 -0.03803700 -0.35392300

C 2.40595700 1.95653500 -0.65455800

C 1.23816600 2.71955400 -0.03315400

N -0.04631600 2.10763200 -0.44752800

C -1.20608500 2.74287600 0.21781900

C -2.50732400 2.07818400 -0.22907300

P -2.31842000 0.20862800 -0.12885000

C -3.26516800 -0.19132700 1.45348300

C -2.49724500 0.34300600 2.67458200

C -3.56080700 -1.69080600 1.62267900

C -3.43722900 -0.32785800 -1.55399800

C -4.91751700 0.05557300 -1.40337400

C -3.26798800 -1.81237600 -1.91880300

P 2.17853600 0.14195800 -0.24806700

C 2.98676800 -0.08210000 1.45155400

C 4.09585600 0.91943200 1.81112500

C 3.44736400 -1.52854400 1.70342400

C 3.22946000 -0.67817700 -1.57912300

C 3.01247700 -2.20048200 -1.64373300

C 4.72177100 -0.31173300 -1.59297400

H 3.36023300 2.37789300 -0.32764700

H 2.37060100 2.04923300 -1.74760700

H -2.71969300 2.34214400 -1.27293100

H -3.34639500 2.44750800 0.37021000

H -4.21861200 0.34986200 1.37391900

H -2.37113600 1.43058400 2.64524200

H -3.05289600 0.10770700 3.59016300

H -1.51129700 -0.12623100 2.73571800

H -4.23865900 -2.06939800 0.85304400

H -4.04608600 -1.85622000 2.59228200

H -2.63575200 -2.27202600 1.59632500

H -3.01593300 0.25534900 -2.38593500

H -5.05403700 1.12193600 -1.19534000

H -5.46165800 -0.17132000 -2.32802400

H -5.39873500 -0.50794600 -0.59787500

H -2.21402500 -2.08483900 -2.01137900

H -3.76265000 -2.01771700 -2.87564400

H -3.71503200 -2.47129500 -1.17022900

H 2.12957000 0.08921700 2.11312000

H 3.74934200 1.95755900 1.80589200

H 4.45862700 0.70879000 2.82422800

H 4.95548100 0.84720600 1.13695100

H 2.64961600 -2.23928100 1.48040100

H 3.71173900 -1.64061500 2.76162100

H 4.33806000 -1.78070100 1.11860900

H 2.76872000 -0.25192800 -2.48259800

H 1.95253500 -2.45840900 -1.57731600

H 3.40826800 -2.59008800 -2.58915200

H 3.52916300 -2.71777700 -0.83180100

H 4.88657700 0.77047400 -1.60527600

H 5.20055400 -0.72721300 -2.48807800

H 5.24604700 -0.72317600 -0.72535900

H -0.11773700 -0.36098900 -2.03188300

Cl -0.01721800 -1.92735400 1.09985200

H -0.11093500 -1.10098200 -1.67272700

H -1.06159100 2.61340900 1.29379300

H -1.23044400 3.82575400 0.01247600

H 1.28424400 2.65993600 1.05972000

H 1.26942300 3.78667800 -0.30581900

H -0.14414700 2.25615100 -1.45145100

### TS1a-1b

$E_{\text{gas}} = -2217.542721$  a.u.

$E_{\text{solv}} = -2219.4569728$  a.u.

Zero-point energy correction = 0.606102 a.u.

Three lowest frequencies:

-129.6203 12.6000 24.9084

Co -0.28222200 -0.10657700 0.70740000

|    |             |             |             |   |             |             |             |
|----|-------------|-------------|-------------|---|-------------|-------------|-------------|
| Cl | -1.04255400 | -1.40761800 | 2.49553300  | H | 5.10414500  | -2.03136400 | 0.91288600  |
| C  | -2.16010600 | 1.02531000  | -1.94334600 | H | 4.27811900  | -3.30275700 | 0.01396300  |
| C  | -0.75574800 | 1.65346900  | -1.95467000 | H | 1.79249400  | -2.18426100 | 2.73368300  |
| N  | 0.27664500  | 0.75660700  | -1.39673700 | H | 3.54752000  | -2.37016000 | 2.92445300  |
| C  | 0.77154300  | -0.23535600 | -2.37042800 | H | 2.61738200  | -3.61573200 | 2.08835700  |
| C  | 1.89927500  | -1.08987000 | -1.77464700 | H | -4.69157000 | -0.31339900 | 0.57525900  |
| P  | 1.39293000  | -1.78532200 | -0.11972300 | H | -3.14840100 | -2.28486900 | 0.63997100  |
| C  | 0.85022400  | -3.56013500 | -0.40997500 | H | -4.70449700 | -2.67294000 | -0.12999700 |
| C  | 1.92702600  | -4.55135000 | -0.87551700 | H | -3.27086800 | -2.42799800 | -1.12649200 |
| C  | -0.35350600 | -3.57529500 | -1.36618000 | H | -5.32228200 | 0.73166800  | -1.64120100 |
| C  | 2.95798700  | -1.79147100 | 0.91945700  | H | -5.94051300 | -0.91614200 | -1.48268900 |
| C  | 4.26336800  | -2.23371700 | 0.23884200  | H | -4.52347900 | -0.60361400 | -2.48281300 |
| C  | 2.70531900  | -2.53446000 | 2.24308100  | H | -2.28375900 | 2.72501600  | 0.52967400  |
| P  | -2.58426500 | 0.48263300  | -0.21116800 | H | -2.41565200 | 1.33728200  | 2.58812400  |
| C  | -4.13431600 | -0.58750100 | -0.32959700 | H | -3.50616700 | 2.73606800  | 2.68175000  |
| C  | -3.78658900 | -2.08082000 | -0.22386100 | H | -4.15625800 | 1.12603500  | 2.36014100  |
| C  | -5.02580300 | -0.31592400 | -1.55290200 | H | -4.28683000 | 2.96866700  | -1.00414100 |
| C  | -3.14734500 | 2.05928200  | 0.65125800  | H | -4.54200600 | 3.71299700  | 0.57499400  |
| C  | -3.31057700 | 1.79344700  | 2.15848700  | H | -5.29057200 | 2.15937400  | 0.21319800  |
| C  | -4.38415000 | 2.75532200  | 0.06529100  | B | 0.91671200  | 1.81055800  | 1.58568900  |
| H  | -2.18397600 | 0.13698200  | -2.58472700 | H | 0.72261000  | 2.15621200  | 2.73448700  |
| H  | -2.88486100 | 1.73276800  | -2.35945200 | H | -0.22204800 | 1.77121400  | 1.04610700  |
| H  | -0.75266400 | 2.56175700  | -1.34627200 | N | 1.82526400  | 2.74662500  | 0.75407600  |
| H  | -0.49593300 | 1.95729100  | -2.98040300 | H | 2.72517400  | 2.76845400  | 1.22978500  |
| H  | 1.05795300  | 1.34266200  | -1.08837600 | C | 1.33067000  | 4.12609000  | 0.71956900  |
| H  | 1.13569400  | 0.26501000  | -3.28145700 | H | 1.14912600  | 4.55063100  | 1.71991800  |
| H  | -0.06903600 | -0.87202600 | -2.66621300 | H | 2.03389500  | 4.77949400  | 0.18936600  |
| H  | 2.77123300  | -0.45138900 | -1.60247400 | H | 0.37611100  | 4.15902600  | 0.18015400  |
| H  | 2.20061100  | -1.86624700 | -2.48575300 | H | 1.37916700  | 0.65619900  | 1.59845800  |
| H  | 0.48920800  | -3.86492200 | 0.58018300  | B | 3.28566200  | 2.51475300  | -1.14187700 |
| H  | 2.70380600  | -4.70223300 | -0.12352500 | H | 2.41878200  | 2.63265200  | -1.96426000 |
| H  | 1.46821200  | -5.52770800 | -1.07263900 | H | 3.63340300  | 1.43271400  | -0.75427100 |
| H  | 2.41026900  | -4.22659000 | -1.80393200 | N | 4.18892500  | 3.58882300  | -0.99185500 |
| H  | -1.13281500 | -2.88433600 | -1.03797400 | H | 3.97352700  | 4.47774000  | -1.42180000 |
| H  | -0.78972600 | -4.57964400 | -1.40395800 | C | 5.38576400  | 3.61093900  | -0.16960700 |
| H  | -0.05883100 | -3.31087400 | -2.38860800 | H | 5.58417000  | 2.60066500  | 0.19774700  |
| H  | 3.05480200  | -0.72453500 | 1.15608200  | H | 6.26636500  | 3.93993100  | -0.73790600 |
| H  | 4.45589600  | -1.68925700 | -0.69016700 | H | 5.29060200  | 4.27320100  | 0.70329500  |

|                                         |             |             |             |   |             |             |             |
|-----------------------------------------|-------------|-------------|-------------|---|-------------|-------------|-------------|
| <b>1b</b>                               |             |             |             | H | -0.11890700 | -3.67333800 | 1.84422200  |
| $E_{\text{gas}} = -2217.557021$         | a.u.        |             |             | H | -3.24715200 | -0.13163000 | -0.73001700 |
| $E_{\text{solv}} = -2219.4777476$       | a.u.        |             |             | H | -4.59078800 | -1.28451800 | 1.03911600  |
| Zero-point energy correction = 0.610157 | a.u.        |             |             | H | -5.41742100 | -1.23296100 | -0.51555700 |
| Co                                      | 0.20976500  | -0.05774300 | -0.58668500 | H | -4.68281200 | -2.73857500 | 0.03432700  |
| Cl                                      | 0.76303100  | -1.24524700 | -2.52417700 | H | -2.32338300 | -1.38735600 | -2.69129400 |
| C                                       | 2.38189700  | 0.53587700  | 2.04082700  | H | -4.09660900 | -1.32062400 | -2.72016600 |
| C                                       | 1.03828800  | 1.24581400  | 2.27258800  | H | -3.27980100 | -2.80914200 | -2.23852400 |
| N                                       | -0.10177400 | 0.52173100  | 1.67819200  | H | 4.54335200  | -0.67013000 | -0.87310000 |
| C                                       | -0.58986500 | -0.59508500 | 2.50931400  | H | 2.83908900  | -2.48260600 | -0.95720600 |
| C                                       | -1.87555200 | -1.19529400 | 1.92204600  | H | 4.39520000  | -3.08631400 | -0.34283400 |
| P                                       | -1.63056300 | -1.60239200 | 0.11843600  | H | 3.06680900  | -2.78968600 | 0.77870800  |
| C                                       | -1.29225700 | -3.44543200 | 0.00571600  | H | 5.50078300  | 0.09014100  | 1.34816800  |
| C                                       | -2.42699400 | -4.38805700 | 0.43253400  | H | 5.93468800  | -1.57979200 | 0.96772000  |
| C                                       | 0.00688300  | -3.77333400 | 0.75949800  | H | 4.66724100  | -1.24999100 | 2.14672300  |
| C                                       | -3.26777800 | -1.22824900 | -0.71806600 | H | 2.44271000  | 2.55939500  | -0.20402600 |
| C                                       | -4.55249500 | -1.65401400 | 0.01026600  | H | 2.34716600  | 1.44930400  | -2.42950400 |
| C                                       | -3.23120300 | -1.71621800 | -2.17693500 | H | 3.52778100  | 2.77482700  | -2.41949000 |
| P                                       | 2.61863500  | 0.22618900  | 0.21961400  | H | 4.07918500  | 1.09904900  | -2.35051400 |
| C                                       | 4.05943900  | -0.98001700 | 0.06186100  | H | 4.55519800  | 2.46007700  | 1.20081100  |
| C                                       | 3.55226700  | -2.41802400 | -0.13151600 | H | 4.75047800  | 3.40525500  | -0.27597900 |
| C                                       | 5.09556000  | -0.91261400 | 1.19678200  | H | 5.41566100  | 1.77575000  | -0.19078900 |
| C                                       | 3.24646000  | 1.86129400  | -0.47108900 | B | -0.75437000 | 2.00049100  | -1.45400300 |
| C                                       | 3.29702800  | 1.78596800  | -2.00788000 | H | -0.34184600 | 2.31000000  | -2.54500100 |
| C                                       | 4.56429900  | 2.39549100  | 0.10807500  | H | 0.22577400  | 1.88482800  | -0.68438100 |
| H                                       | -0.86252400 | 1.19813100  | 1.55323700  | N | -1.71500700 | 3.09263600  | -0.85198600 |
| H                                       | -0.78038900 | -0.25703200 | 3.54059600  | H | -2.55560400 | 3.07535600  | -1.43201300 |
| H                                       | 0.19427200  | -1.35815800 | 2.56278900  | C | -1.15534700 | 4.46086100  | -0.99646700 |
| H                                       | -2.67432300 | -0.44863900 | 1.97655400  | H | -0.94094100 | 4.68460300  | -2.04535500 |
| H                                       | -2.19417800 | -2.06128800 | 2.51138000  | H | -1.86682400 | 5.18006700  | -0.58469000 |
| H                                       | -1.09291000 | -3.58495700 | -1.06387300 | H | -0.22326500 | 4.51446800  | -0.42768100 |
| H                                       | -3.30114600 | -4.30487600 | -0.21607700 | H | -1.34928400 | 0.92463500  | -1.52644500 |
| H                                       | -2.08016800 | -5.42711000 | 0.38257700  | B | -2.27570400 | 2.86557400  | 0.67064500  |
| H                                       | -2.74963200 | -4.20352000 | 1.46348700  | H | -1.31014800 | 3.06800700  | 1.40125800  |
| H                                       | 0.82576100  | -3.12600400 | 0.43914700  | H | -2.63093200 | 1.68545000  | 0.70377700  |
| H                                       | 0.30213300  | -4.80973300 | 0.56187800  | N | -3.39211000 | 3.84018800  | 0.95185800  |

|   |             |             |             |
|---|-------------|-------------|-------------|
| H | -3.26731300 | 4.35196600  | 1.81604900  |
| C | -4.76919500 | 3.39511000  | 0.82370700  |
| H | -5.06477000 | 2.58649900  | 1.52070300  |
| H | -5.47373500 | 4.22547100  | 0.96845900  |
| H | -4.94913200 | 3.00816700  | -0.18817800 |
| H | 0.88472200  | 1.39707700  | 3.35248000  |
| H | 1.05345200  | 2.23932600  | 1.81555400  |
| H | 3.19332300  | 1.12292300  | 2.48303100  |
| H | 2.38890400  | -0.43816400 | 2.54347700  |

**2a**

$E_{\text{gas}} = -2562.933958$  a.u.

$E_{\text{solv}} = -2565.1605574$  a.u.

Zero-point energy correction = 0.787713 a.u.

|    |             |             |             |
|----|-------------|-------------|-------------|
| Co | 0.13470600  | -1.02776300 | -0.26801000 |
| C  | -2.24051300 | -0.52045100 | 2.17841700  |
| C  | -1.25435900 | -1.65012600 | 2.52553600  |
| N  | 0.10713900  | -1.38663400 | 2.03657900  |
| C  | 0.86744600  | -0.44351200 | 2.86501300  |
| C  | 2.28302200  | -0.24273800 | 2.30502000  |
| P  | 2.22905000  | 0.16476400  | 0.47868100  |
| P  | -2.14129800 | -0.11265800 | 0.35682000  |
| H  | -1.97878400 | 0.39250200  | 2.72611000  |
| H  | -3.25088700 | -0.79452000 | 2.49510800  |
| H  | -1.58454100 | -2.58167000 | 2.05645000  |
| H  | -1.26163200 | -1.81909400 | 3.61487800  |
| H  | 0.61531000  | -2.30423000 | 1.95847600  |
| H  | 0.93284300  | -0.79462100 | 3.90897200  |
| H  | 0.33873800  | 0.51685100  | 2.89175100  |
| H  | 2.84217200  | -1.17981900 | 2.40421200  |
| H  | 2.82060400  | 0.51642600  | 2.88339500  |
| Cl | 0.06909500  | -0.35414100 | -2.50366200 |
| C  | -3.62135400 | -0.90932700 | -0.49236700 |
| C  | -3.21592100 | -2.22473400 | -1.21110100 |
| C  | -4.87759100 | -1.15318700 | 0.36575400  |
| C  | -4.44795400 | -3.07484900 | -1.61378100 |
| H  | -2.60960200 | -1.97385600 | -2.08684300 |
| C  | -6.09485400 | -1.47246700 | -0.54072100 |

|   |             |             |             |
|---|-------------|-------------|-------------|
| H | -4.68504100 | -2.00049400 | 1.03649500  |
| C | -5.68758800 | -2.20151800 | -1.84268500 |
| H | -4.21300300 | -3.65911300 | -2.50962700 |
| H | -6.80605400 | -2.08545700 | 0.02593900  |
| H | -6.52481500 | -2.80283600 | -2.21395900 |
| C | -2.48136600 | 1.73076000  | 0.30547500  |
| C | -2.27383900 | 2.29564000  | -1.12792600 |
| C | -3.82680600 | 2.20983100  | 0.88403500  |
| C | -2.96555800 | 3.66610700  | -1.32304100 |
| H | -1.20052700 | 2.37360500  | -1.32551200 |
| C | -3.82943500 | 3.74975700  | 1.06078100  |
| H | -4.63311100 | 1.91412000  | 0.20243800  |
| C | -2.98761700 | 4.47181900  | -0.01870000 |
| H | -2.45774400 | 4.22281100  | -2.11804600 |
| H | -4.86570100 | 4.10660700  | 1.02822000  |
| H | -3.37883500 | 5.48076000  | -0.18924600 |
| H | -6.62137000 | -0.54308000 | -0.78982500 |
| H | -5.11230300 | -0.29929800 | 1.00781200  |
| H | -3.88211700 | -0.17112400 | -1.26245600 |
| H | -2.56586200 | -2.82314300 | -0.56440200 |
| H | -4.67272500 | -3.80493600 | -0.82496000 |
| H | -5.46814500 | -1.46848600 | -2.62965000 |
| H | -1.68815000 | 2.13567700  | 0.95049400  |
| H | -4.04394200 | 1.73166900  | 1.84524100  |
| H | -2.64810700 | 1.59319700  | -1.88037600 |
| H | -3.44828500 | 4.00677800  | 2.05649400  |
| H | -1.95631300 | 4.60244200  | 0.33571200  |
| H | -3.99783400 | 3.51955700  | -1.66700800 |
| C | 2.51447200  | 2.01593200  | 0.38449700  |
| C | 2.57603100  | 2.49577000  | -1.09679800 |
| C | 1.44637900  | 2.81212000  | 1.15888700  |
| C | 2.13025900  | 3.96711900  | -1.26111700 |
| H | 3.60537000  | 2.38890400  | -1.45611700 |
| C | 1.81171000  | 4.31484300  | 1.22913900  |
| H | 0.48149900  | 2.68445800  | 0.65444900  |
| C | 2.53497500  | 4.80970300  | -0.04653300 |
| H | 2.55922400  | 4.37694100  | -2.18192900 |
| H | 0.89227000  | 4.89169200  | 1.38711800  |

|   |             |             |             |
|---|-------------|-------------|-------------|
| H | 2.31964000  | 5.87051400  | -0.21514500 |
| C | 3.78688200  | -0.66152600 | -0.15838800 |
| C | 3.89116700  | -0.69593100 | -1.69667500 |
| C | 5.11951800  | -0.18214300 | 0.47265900  |
| C | 4.91952200  | -1.76853400 | -2.13165600 |
| H | 2.91687600  | -0.89624100 | -2.15096600 |
| C | 6.34492300  | -0.61448000 | -0.37388800 |
| H | 5.13274600  | 0.90899900  | 0.57704700  |
| C | 6.07767200  | -1.93000000 | -1.11625600 |
| H | 4.40973300  | -2.72958400 | -2.26259400 |
| H | 6.57745800  | 0.16593400  | -1.10958500 |
| H | 3.60698500  | -1.69766300 | 0.15951400  |
| H | 5.20605400  | -0.58910600 | 1.48752100  |
| H | 7.22726000  | -0.69893700 | 0.27068500  |
| H | 6.98450600  | -2.27483100 | -1.62531200 |
| H | 5.82961400  | -2.70855700 | -0.38253200 |
| H | 5.32070300  | -1.49495700 | -3.11449300 |
| H | 4.20829700  | 0.28878900  | -2.05843600 |
| H | 3.48096800  | 2.21241600  | 0.86831400  |
| H | 1.95265700  | 1.85646500  | -1.73177200 |
| H | 1.04091100  | 4.01485300  | -1.38724700 |
| H | 3.62226300  | 4.73715100  | 0.08839700  |
| H | 2.44306500  | 4.49963600  | 2.10653700  |
| H | 1.31840800  | 2.42650600  | 2.17601900  |
| H | 1.53782200  | -2.50024400 | -0.63124100 |
| N | 1.20764300  | -3.85196000 | 1.17380500  |
| H | 2.21664400  | -3.98317800 | 1.18098500  |
| B | 0.76335500  | -3.37900400 | -0.22350700 |
| H | 0.64285400  | -4.22648900 | -1.08534500 |
| C | 0.58631000  | -5.09887800 | 1.62406000  |
| H | 0.94308900  | -5.38773700 | 2.62158000  |
| H | -0.49941200 | -4.96068000 | 1.69273700  |
| H | 0.75403900  | -5.94792900 | 0.94076900  |
| H | -0.38718200 | -2.85074900 | -0.12023600 |

**TS2a-2b**

$E_{\text{gas}} = -2684.213987$  a.u.

$E_{\text{solv}} = -2686.564678$  a.u.

Zero-point energy correction = 0.860058 a.u.

**Three lowest frequencies:**

|    |                  |                |                |
|----|------------------|----------------|----------------|
|    | <b>-133.4234</b> | <b>17.5366</b> | <b>23.0269</b> |
| Co | 0.12856600       | -0.56169100    | -0.53325900    |
| C  | -2.04079400      | -1.25381500    | 2.05678500     |
| C  | -0.71023500      | -2.01610900    | 2.17315000     |
| N  | 0.43703800       | -1.22912700    | 1.68239100     |
| C  | 0.87517700       | -0.17694300    | 2.61699300     |
| C  | 2.08052100       | 0.59299300     | 2.06182700     |
| P  | 1.77228700       | 1.14777000     | 0.30184800     |
| P  | -2.25349000      | -0.56462200    | 0.33050500     |
| H  | -2.05638100      | -0.40437200    | 2.74913600     |
| H  | -2.86607500      | -1.90802200    | 2.35107800     |
| H  | -0.75291800      | -2.92400600    | 1.56581100     |
| H  | -0.55422300      | -2.33125000    | 3.21673100     |
| H  | 1.13212000       | -0.60749100    | 3.59755700     |
| H  | 0.03554900       | 0.50819600     | 2.77711100     |
| H  | 2.94917100       | -0.07211300    | 2.04456200     |
| H  | 2.32680400       | 1.43324400     | 2.71984500     |
| Cl | -0.37001400      | 0.36017700     | -2.61762500    |
| C  | -3.48614800      | -1.66196000    | -0.57743300    |
| C  | -2.76806300      | -2.64584200    | -1.53995900    |
| C  | -4.50797000      | -2.43041000    | 0.28259000     |
| C  | -3.71095600      | -3.77349900    | -2.03235400    |
| H  | -2.36087600      | -2.07913600    | -2.38276700    |
| C  | -5.65279600      | -2.98155200    | -0.60701000    |
| H  | -3.99297400      | -3.26330400    | 0.77863500     |
| C  | -5.17702800      | -3.32387300    | -2.03834300    |
| H  | -3.40047400      | -4.10075800    | -3.03013800    |
| H  | -6.07374900      | -3.87373000    | -0.12802400    |
| H  | -5.82019300      | -4.09711600    | -2.47281700    |
| C  | -3.16210400      | 1.05045600     | 0.61822100     |
| C  | -3.29504400      | 1.85707800     | -0.70412900    |
| C  | -4.52216200      | 0.96926700     | 1.33798000     |
| C  | -4.39893500      | 2.93867700     | -0.62172800    |
| H  | -2.32794300      | 2.31017900     | -0.94152100    |
| C  | -4.99178400      | 2.37853000     | 1.78062800     |
| H  | -5.26021900      | 0.53024000     | 0.65633900     |
| C  | -4.53789500      | 3.48886600     | 0.80269600     |

|   |             |             |             |                                              |             |             |             |
|---|-------------|-------------|-------------|----------------------------------------------|-------------|-------------|-------------|
| H | -4.17710300 | 3.74289000  | -1.33152300 | H                                            | 6.74969400  | 1.98717800  | -0.20184800 |
| H | -6.08512800 | 2.37593800  | 1.86297900  | H                                            | 6.88369300  | 0.60547500  | -2.25310400 |
| H | -5.24304400 | 4.32674000  | 0.83049400  | H                                            | 6.01881900  | -0.29534800 | -1.02408400 |
| H | -6.46598000 | -2.24716800 | -0.65618600 | H                                            | 4.95270800  | 0.94839800  | -3.57724400 |
| H | -4.92879700 | -1.81002100 | 1.07915100  | H                                            | 3.40359500  | 2.15295900  | -2.28132200 |
| H | -4.04288100 | -0.93899700 | -1.18828900 | H                                            | 2.31804500  | 3.43097700  | 0.91870500  |
| H | -1.90313200 | -3.09635800 | -1.04303100 | H                                            | 0.82616200  | 2.90312200  | -1.67479300 |
| H | -3.61539400 | -4.65218500 | -1.38074900 | H                                            | -0.68489700 | 4.61059400  | -1.04641300 |
| H | -5.27891000 | -2.44466000 | -2.68751100 | H                                            | 1.61724800  | 5.92591100  | 0.48114900  |
| H | -2.47471100 | 1.59432900  | 1.28200000  | H                                            | 0.67506900  | 5.08956700  | 2.46540800  |
| H | -4.47637300 | 0.30881700  | 2.21057800  | H                                            | 0.27377500  | 2.77122100  | 2.27498900  |
| H | -3.50733500 | 1.19003300  | -1.54655900 | H                                            | 1.86221800  | -1.47468300 | -1.12197200 |
| H | -4.60954200 | 2.59533600  | 2.78542100  | N                                            | 2.11700800  | -3.46851500 | -0.00842800 |
| H | -3.56959600 | 3.89686500  | 1.12229500  | H                                            | 3.05663300  | -3.57994800 | -0.38430000 |
| H | -5.36257600 | 2.51546600  | -0.93420600 | B                                            | 1.34570500  | -2.60165100 | -1.03537900 |
| C | 1.43973500  | 2.98785800  | 0.42960700  | H                                            | 1.25979700  | -3.07588800 | -2.15033600 |
| C | 1.25953400  | 3.62904400  | -0.97807800 | C                                            | 1.55267500  | -4.81553100 | 0.12490700  |
| C | 0.21794600  | 3.29779200  | 1.31583500  | H                                            | 2.16525200  | -5.43022200 | 0.79528900  |
| C | 0.37028000  | 4.89396700  | -0.94082800 | H                                            | 0.54788200  | -4.74978300 | 0.55909300  |
| H | 2.24759000  | 3.89315700  | -1.37061100 | H                                            | 1.45381400  | -5.34297500 | -0.83703900 |
| C | 0.09140000  | 4.81837900  | 1.57750800  | H                                            | 0.15839400  | -2.46228900 | -0.63429800 |
| H | -0.68180700 | 2.92888800  | 0.81016100  | B                                            | 3.37925700  | -3.07417800 | 1.97172800  |
| C | 0.55600500  | 5.66712100  | 0.36958600  | H                                            | 2.43425400  | -3.05453000 | 2.71231900  |
| H | 0.60078700  | 5.52733500  | -1.80429300 | H                                            | 3.82436000  | -2.06029000 | 1.50573600  |
| H | -0.95427400 | 5.04735600  | 1.81704100  | N                                            | 4.23863300  | -4.19315800 | 2.04604700  |
| H | 0.01219500  | 6.61782700  | 0.34497300  | H                                            | 3.93548500  | -5.01472100 | 2.55049200  |
| C | 3.45835700  | 0.93923400  | -0.48741200 | C                                            | 5.50588700  | -4.36315900 | 1.35808900  |
| C | 3.45059500  | 1.08905800  | -2.02227900 | H                                            | 6.30756200  | -4.66517900 | 2.04576500  |
| C | 4.60880000  | 1.76679700  | 0.14131700  | H                                            | 5.45945700  | -5.11486000 | 0.55628500  |
| C | 4.73408500  | 0.46163400  | -2.61954100 | H                                            | 5.79613800  | -3.41100100 | 0.90592900  |
| H | 2.56168600  | 0.62357700  | -2.45684600 | H                                            | 1.21136900  | -1.87989200 | 1.51835400  |
| C | 5.84120200  | 1.84115400  | -0.79716700 | <b>2b</b>                                    |             |             |             |
| H | 4.27911200  | 2.78729700  | 0.36883300  | $E_{\text{gas}} = -2684.218865$ a.u.         |             |             |             |
| C | 5.95376800  | 0.58743300  | -1.67386400 | $E_{\text{solv}} = -2686.576841$ a.u.        |             |             |             |
| H | 4.55209800  | -0.59526000 | -2.84477700 | Zero-point energy correction = 0.865203 a.u. |             |             |             |
| H | 5.75669100  | 2.72131800  | -1.44738700 | Co                                           | 0.05256200  | 0.09500000  | 0.01899000  |
| H | 3.64466500  | -0.12306600 | -0.27913400 | C                                            | -2.39932600 | -0.90587100 | 1.76498000  |
| H | 4.89671600  | 1.31448400  | 1.09781100  |                                              |             |             |             |

|    |             |             |             |   |             |             |             |
|----|-------------|-------------|-------------|---|-------------|-------------|-------------|
| C  | -1.25068000 | -0.48601800 | 2.68448100  | H | -5.02650400 | -0.91746900 | -3.49665600 |
| N  | 0.05604700  | -0.55261100 | 1.97391200  | H | -2.37122100 | 2.06509300  | 1.49793200  |
| C  | 1.15689100  | -0.03452800 | 2.83063000  | H | -4.65889900 | 0.94330500  | 1.80488700  |
| C  | 2.50015600  | -0.10685100 | 2.10090200  | H | -2.89153600 | 2.31555200  | -1.48365700 |
| P  | 2.31699100  | 0.50430900  | 0.34417700  | H | -4.61804800 | 3.08211500  | 2.80206400  |
| P  | -2.25290900 | 0.07409600  | 0.19219400  | H | -3.14689200 | 4.49231900  | 1.62191100  |
| H  | -3.35970100 | -0.78206900 | 2.27416800  | H | -4.67176700 | 3.76810800  | -0.92807600 |
| H  | -2.28534100 | -1.96432600 | 1.51360900  | C | 2.78350000  | 2.32084000  | 0.41153800  |
| H  | 2.81095600  | -1.15480300 | 2.03247200  | C | 3.07768500  | 2.90860500  | -0.99977200 |
| H  | 3.26992300  | 0.43627600  | 2.65961700  | C | 1.70516600  | 3.16894300  | 1.11658300  |
| Cl | 0.01434800  | 1.12749100  | -2.01190700 | C | 2.85247100  | 4.43826200  | -1.06122900 |
| C  | -3.41972300 | -0.64956600 | -1.08389300 | H | 4.11587000  | 2.68083600  | -1.26558500 |
| C  | -2.66257600 | -1.44350300 | -2.18520300 | C | 2.21046000  | 4.60890000  | 1.38050600  |
| C  | -4.56970800 | -1.49753700 | -0.50105200 | H | 0.81490500  | 3.18778900  | 0.47700000  |
| C  | -3.59394300 | -2.42670200 | -2.93278200 | C | 3.17458700  | 5.10771900  | 0.27892300  |
| H  | -2.21776300 | -0.72788800 | -2.88235300 | H | 3.46076200  | 4.86368800  | -1.86686200 |
| C  | -5.64089700 | -1.77266700 | -1.58622600 | H | 1.34351100  | 5.27686800  | 1.44978500  |
| H  | -4.15798900 | -2.44627600 | -0.13638300 | H | 3.12089700  | 6.19877800  | 0.19584400  |
| C  | -5.03170100 | -1.89830800 | -3.00315100 | C | 3.67624200  | -0.40375700 | -0.55673100 |
| H  | -3.19689600 | -2.61057700 | -3.93672400 | C | 3.56851400  | -0.36030400 | -2.09428500 |
| H  | -6.17567800 | -2.69317200 | -1.32365100 | C | 5.11475800  | -0.06572600 | -0.08136600 |
| H  | -5.65850500 | -2.54717500 | -3.62472800 | C | 4.44236100  | -1.48082800 | -2.70907800 |
| C  | -2.97766600 | 1.74825900  | 0.63729700  | H | 2.52891000  | -0.47400000 | -2.41055500 |
| C  | -2.76972400 | 2.78631200  | -0.50259800 | C | 6.17469900  | -0.51910500 | -1.11712200 |
| C  | -4.45207700 | 1.74600900  | 1.08972700  | H | 5.23386300  | 1.00875600  | 0.09793800  |
| C  | -3.74149700 | 3.98526700  | -0.38703900 | C | 5.71514000  | -1.77084200 | -1.87527900 |
| H  | -1.73247900 | 3.13121000  | -0.48069100 | H | 3.84675300  | -2.39539700 | -2.79751900 |
| C  | -4.83006400 | 3.10728500  | 1.72638100  | H | 6.35305400  | 0.28851200  | -1.83865400 |
| H  | -5.09004800 | 1.55378700  | 0.21886600  | H | 3.44691900  | -1.43668800 | -0.27026300 |
| C  | -4.07882100 | 4.29357500  | 1.07613900  | H | 5.30041900  | -0.56210200 | 0.87899100  |
| H  | -3.30189800 | 4.85936000  | -0.87951700 | H | 7.13095900  | -0.69412800 | -0.61106000 |
| H  | -5.91276400 | 3.25089300  | 1.63080500  | H | 6.51706700  | -2.14305000 | -2.52250600 |
| H  | -4.67702300 | 5.20776400  | 1.15536500  | H | 5.51481300  | -2.57107800 | -1.15079100 |
| H  | -6.38843500 | -0.97001700 | -1.57599800 | H | 4.72243200  | -1.18930400 | -3.72828200 |
| H  | -5.03915400 | -1.01406000 | 0.36110700  | H | 3.90263400  | 0.61643600  | -2.45986100 |
| H  | -3.86753700 | 0.23929000  | -1.54743700 | H | 3.69834200  | 2.37102700  | 1.01855900  |
| H  | -1.82065400 | -1.99208600 | -1.75658900 | H | 2.43813300  | 2.42942600  | -1.74540500 |
| H  | -3.59734800 | -3.40048800 | -2.42536500 | H | 1.80795800  | 4.64537900  | -1.32584600 |



|   |             |             |             |
|---|-------------|-------------|-------------|
| H | 4.21146000  | 4.87385000  | 0.55489300  |
| H | 2.71040100  | 4.65246200  | 2.35570400  |
| H | 1.39726800  | 2.72152000  | 2.06687400  |
| H | 1.88277700  | -2.61743100 | -0.58582700 |
| N | 0.32205600  | -4.07668900 | 0.18040200  |
| H | 1.07214200  | -4.74711000 | 0.00656600  |
| B | 0.69971300  | -2.82183500 | -0.72803300 |
| H | 0.40426500  | -3.03490200 | -1.88543200 |
| C | -0.92538200 | -4.76352500 | -0.22881900 |
| H | -1.09501600 | -5.62645600 | 0.42064600  |
| H | -1.76134100 | -4.06694200 | -0.12047700 |
| H | -0.87036900 | -5.07722000 | -1.27536300 |
| H | 0.03406400  | -1.82385500 | -0.34977100 |
| B | 0.35654700  | -3.87665200 | 1.79519700  |
| H | -0.71061800 | -3.34831100 | 2.09257000  |
| H | 1.30496700  | -3.11207500 | 2.01389200  |
| N | 0.48707500  | -5.22223000 | 2.47226900  |
| C | 1.81453300  | -5.69510300 | 2.82833200  |
| H | 1.78147800  | -6.71520300 | 3.23534600  |
| H | 2.45249200  | -5.73761600 | 1.93530400  |
| H | 2.35379500  | -5.06317100 | 3.56118100  |
| H | -0.14174000 | -5.32908500 | 3.25873200  |
| H | 1.20036700  | -0.61767600 | 3.76065200  |
| H | 0.90963900  | 0.99646200  | 3.10130600  |
| H | -1.21870400 | -1.13407700 | 3.56982600  |
| H | -1.38879800 | 0.54402400  | 3.03298500  |
| H | 0.25433400  | -1.55431400 | 1.82792200  |
